# Supplementary material for: Extracellular matrix proteomics identifies molecular signature of symptomatic carotid plaques
Source: PubMed Central journal article supplement (PMC5373893; doi:10.1172/jci86924), 2017-03-20

## ONLINE SUPPLEMENT

### **Extracellular Matrix Proteomics Identifies Molecular Signature of Symptomatic Carotid Plaques**

Sarah R. Langley<sup>\*1,2</sup>, Karin Willeit<sup>\*3</sup>, Athanasios Didangelos<sup>\*1</sup>, Ljubica Perisic Matic<sup>4</sup>,  
Philipp Skroblin<sup>1</sup>, Javier Barallobre-Barreiro<sup>1</sup>, Mariette Lengquist<sup>4</sup>, Gregor Rungger<sup>5</sup>,  
Alexander Kapustin<sup>1</sup>, Ludmilla Kedenko<sup>6</sup>, Chris Molenaar<sup>7</sup>, Ruifang Lu<sup>1</sup>, Temo Barwari<sup>1</sup>,  
Gonca Suna<sup>1</sup>, Xiaoke Yin<sup>1</sup>, Bernhard Iglseder<sup>8</sup>, Bernhard Paulweber<sup>6</sup>, Peter Willeit<sup>3,9</sup>, Joseph  
Shalhoub<sup>10</sup>, Gerard Pasterkamp<sup>11</sup>, Alun H. Davies<sup>10</sup>, Claudia Monaco<sup>12</sup>, Ulf Hedin<sup>4</sup>,  
Catherine M. Shanahan<sup>1</sup>, Johann Willeit<sup>3</sup>, Stefan Kiechl<sup>3</sup>, Manuel Mayr<sup>1</sup>

From the <sup>1</sup>King's British Heart Foundation Centre, King's College London, London, United Kingdom; <sup>2</sup>Duke-NUS Medical School, Singapore, Republic of Singapore; <sup>3</sup>Department of Neurology, Medical University Innsbruck, Austria; <sup>4</sup>Department of Molecular Medicine and Surgery, Vascular Surgery, Karolinksa University, Stockholm, Sweden; <sup>5</sup>Department of Neurology, Bruneck Hospital, Bruneck, Italy; <sup>6</sup>First Department of Internal Medicine, Paracelsus Medical University, Salzburg, Austria; <sup>7</sup>Nikon Imaging Centre, King's College London, London, United Kingdom; <sup>8</sup>Department of Geriatric Medicine, Paracelsus Medical University, Salzburg, Austria; <sup>9</sup>Department of Public Health and Primary Care, University of Cambridge, Cambridge, United Kingdom; <sup>10</sup>Department of Surgery & Cancer, Imperial College London, London, United Kingdom; <sup>11</sup>University Medical Center Utrecht, Utrecht, The Netherlands; <sup>12</sup>Kennedy Institute, University of Oxford, Oxford, United Kingdom

**\* Equal contribution**

**Supplementary Table 1. Clinical characteristics of the patient cohort undergoing carotid endarterectomy.**

|                           | <b>Asymptomatic<br/>(n=6)</b> | <b>Symptomatic<br/>(n=6)</b> |
|---------------------------|-------------------------------|------------------------------|
| Gender (M:F)              | 3:3                           | 3:3                          |
| Age                       | 70±6.1                        | 75±5.3                       |
| Symptomatic (%)           | 0%                            | 100%                         |
| Type of Event             | n/a                           | Stroke*                      |
| Side of Body (Left:Right) | n/a                           | 4:2                          |
| Diabetes (%)              | 2 (33.3%)                     | 1 (16.7%)                    |
| Hypertension (%)          | 6 (100%)                      | 6 (100%)                     |
| PAD (%)                   | 2 (33.3%)                     | 3 (50%)                      |
| Smoker (%)                | 2 (33.3%)                     | 5 (83.3%)                    |
| Aspirin (%)               | 6 (100%)                      | 6 (100%)                     |
| Clopidogrel (%)           | 1 (16.7%)                     | 2 (33.3%)                    |
| Dipyridamole (%)          | 0 (0%)                        | 1 (16.7%)                    |
| Statin (%)                | 6 (100%)                      | 5 (83.3%)                    |

There were no significant differences using the Student's t test or Chi-squared test.

\* ischemic stroke in the ipsilateral carotid territory

**Supplementary Table 2. List of ECM proteins identified after proteomics analysis of carotid endarterectomies from symptomatic and asymptomatic patients.**

| Protein name                               | Uniprot ID    | Gene ID  | Guanidine extracts |              |       |                    | NaCl extracts |            |                     |                    | Transcriptomics                     |       |              |
|--------------------------------------------|---------------|----------|--------------------|--------------|-------|--------------------|---------------|------------|---------------------|--------------------|-------------------------------------|-------|--------------|
|                                            |               |          | Log2 (Fold Change) |              | FDR   | Log2 (Fold Change) |               | FDR        | Affymetrix Probe ID | Log2 (Fold Change) | FDR                                 |       |              |
|                                            |               |          | Symptomatic        | Asymptomatic |       | Symptomatic        | Asymptomatic  |            |                     |                    |                                     |       |              |
| Adipocyte enhancer-binding protein 1       | AEBP1_HUMAN   | AEBP1    | 196.3±32.9         | 203.8±41     | -0.05 | 0.808              | 89.2±11.9     | 90.5±23.1  | -0.02               | 0.910              | 205040_at                           | -0.05 | 0.782        |
| Adiponectin                                | ADIPO_HUMAN   | ADIPOQ   | -                  | -            | -     | -                  | 5.5±2.1       | 6.2±2.6    | -0.17               | 0.602              | -                                   | -     | -            |
| Aggrecan                                   | PGCA_HUMAN    | ACAN     | 66±60.1            | 94.8±61.8    | -0.52 | 0.249              | 2.8±4.9       | 2±1.9      | 0.50                | 0.538              | -                                   | -     | -            |
| Aggrin                                     | AGRIN_HUMAN   | AGRN     | 2.2±4.4            | 2.2±1.5      | 0.00  | 0.970              | -             | -          | -                   | -                  | 212285_s_at; 217419_x_at            | -0.11 | 0.305        |
| Alpha-1-acid glycoprotein 1                | A1AG1_HUMAN   | ORM1     | -                  | -            | -     | -                  | 41.8±11       | 36±5.4     | 0.22                | 0.270              | 205040_at                           | 0.03  | 0.752        |
| Alpha-1-acid glycoprotein 2                | A1AG2_HUMAN   | ORM2     | -                  | -            | -     | -                  | 13.5±7.2      | 11.7±1.9   | 0.21                | 0.405              | 214465_at                           | -0.04 | 0.662        |
| Alpha-1-B glycoprotein                     | A1BG_HUMAN    | A1BG     | 15.2±4.4           | 14.2±3.8     | 0.10  | 0.757              | -             | -          | -                   | -                  | 229819_at                           | 0.10  | 0.295        |
| Alpha-2-HS-glycoprotein                    | FETUA_HUMAN   | AHS2     | 17.3±20.5          | 7.8±11.7     | 1.15  | <b>0.052</b>       | -             | -          | -                   | -                  | -                                   | -     | -            |
| Angiotensinogen                            | ANGT_HUMAN    | AGT      | -                  | -            | -     | -                  | 6.7±4.3       | 8.8±1.7    | -0.41               | 0.325              | 202834_at                           | -0.06 | 0.774        |
| Annexin A2                                 | ANXA2_HUMAN   | ANXA2    | -                  | -            | -     | -                  | 79±7          | 87.8±18.4  | -0.15               | 0.381              | -                                   | -     | -            |
| Apolipoprotein A                           | APOA_HUMAN    | LPA      | 7.7±5.4            | 13.5±13.3    | -0.82 | 0.410              | 4.8±5.5       | 9.7±7.8    | -1.00               | 0.258              | 209978_s_at                         | 0.00  | 0.995        |
| Apolipoprotein A-II                        | APOA1_HUMAN   | APOA1    | 273.7±202.4        | 174.8±98.9   | 0.65  | <b>0.011</b>       | 123.8±38.6    | 96.3±14.5  | 0.36                | <b>0.075</b>       | 217073_x_at; 204450_x_at            | -0.04 | 0.661        |
| Apolipoprotein A-I                         | APOA2_HUMAN   | APOA2    | 5±4                | 3.5±1.4      | 0.51  | 0.200              | 10.2±2.8      | 17.8±10.1  | -0.81               | <b>0.022</b>       | 219465_at; 219466_s_at              | 0.06  | 0.483        |
| Apolipoprotein A-IV                        | APOA4_HUMAN   | APOA4    | 207.3±103.3        | 176.7±47.3   | 0.23  | 0.199              | 36.2±11.9     | 49±7.6     | -0.44               | 0.121              | 206894_at                           | 0.04  | 0.765        |
| Apolipoprotein B                           | APOB_HUMAN    | APOB     | 500.3±780.5        | 136±216.6    | 1.88  | <b>0.004</b>       | 248.2±101.1   | 226.2±74.3 | -0.13               | 0.579              | 205108_s_at                         | -0.16 | 0.388        |
| Apolipoprotein C-I (truncated)             | K7ER19_HUMAN  | APOC1    | 6.2±7.6            | 4.3±2.9      | 0.51  | 0.161              | -             | -          | -                   | -                  | -                                   | -     | -            |
| Apolipoprotein C-II                        | APOC2_HUMAN   | APOC2    | -                  | -            | -     | -                  | 6.5±5.3       | 8.3±5.1    | -0.36               | 0.206              | 204561_x_at                         | 0.27  | 0.324        |
| Apolipoprotein C-III                       | APOC3_HUMAN   | APOC3    | 10±3.7             | 14.7±5.2     | -0.55 | 0.122              | 11.5±2.7      | 16.8±11.9  | -0.55               | <b>0.063</b>       | 205820_s_at                         | -0.03 | 0.817        |
| Apolipoprotein D                           | APOD_HUMAN    | APOD     | 17.7±10.8          | 21.5±8.6     | -0.28 | 0.302              | 10.2±6.2      | 15.5±3.2   | -0.61               | <b>0.084</b>       | 201525_at                           | -0.07 | 0.614        |
| Apolipoprotein E                           | APOE_HUMAN    | APOE     | 252.8±89.6         | 282±79.7     | -0.16 | 0.264              | 65.3±16       | 83.5±30.9  | -0.35               | 0.115              | 203381_s_at; 203382_s_at            | 0.46  | 0.129        |
| Apolipoprotein H                           | APOH_HUMAN    | APOH     | 48.8±29.6          | 56.3±30.9    | -0.21 | 0.407              | 36.2±12       | 44.2±9.1   | -0.29               | 0.231              | 205216_s_at                         | 0.01  | 0.878        |
| Apolipoprotein L 1                         | APOL1_HUMAN   | APOL1    | -                  | -            | -     | -                  | 5±1.9         | 2.2±1.2    | 1.21                | <b>0.073</b>       | -                                   | -     | -            |
| Aspirin                                    | ASPN_HUMAN    | ASPN     | 57.7±26.6          | 96.7±35      | -0.75 | <b>0.032</b>       | -             | -          | -                   | -                  | 224396_s_at                         | -0.52 | 0.129        |
| Biglycan                                   | BIG1_HUMAN    | BGN      | 361.5±76.7         | 405.2±43.1   | -0.16 | 0.232              | 18.8±8.6      | 14.5±10.9  | 0.38                | 0.231              | 201262_s_at                         | -0.41 | 0.129        |
| Carboxypeptidase B2                        | CBPB2_HUMAN   | CPB2     | 6±7.8              | 6.8±6.3      | -0.19 | 0.705              | -             | -          | -                   | -                  | -                                   | -     | -            |
| Cartilage acidic protein 1                 | CRAC1_HUMAN   | CRAC1    | 1.7±1.2            | 2.8±3.3      | -0.77 | 0.387              | -             | -          | -                   | -                  | 221204_s_at; 1555958_at             | 0.39  | <b>0.074</b> |
| Cartilage oligomeric matrix protein        | COMP_HUMAN    | COMP     | 1.5±2.5            | 3.3±7.2      | -1.15 | 0.243              | 3.7±5.6       | 4.8±6.6    | -0.40               | 0.450              | 205713_s_at                         | 0.38  | 0.145        |
| Cathepsin B                                | CATB_HUMAN    | CTSB     | 22.2±19.6          | 11.8±14.3    | 0.91  | <b>0.060</b>       | 28.5±13.5     | 24±13.5    | 0.25                | 0.317              | 213275_x_at; 227961_at              | 0.40  | <b>0.074</b> |
| Cathepsin D                                | CATD_HUMAN    | CTSD     | 17.5±14.6          | 15.7±9.5     | 0.16  | 0.613              | 26.8±9.2      | 19.8±7.1   | 0.44                | 0.170              | 200766_at                           | 0.30  | 0.141        |
| Cathepsin F                                | CATF_HUMAN    | CTSF     | 2.2±2.3            | 3.3±2.4      | -0.62 | 0.333              | -             | -          | -                   | -                  | -                                   | -     | -            |
| Cathepsin G                                | CATG_HUMAN    | CTSG     | 0.7±0.8            | 5.7±4.4      | -3.09 | <b>0.011</b>       | -             | -          | -                   | -                  | 205653_at                           | 0.25  | 0.261        |
| Cathepsin S                                | CATS_HUMAN    | CTSS     | -                  | -            | -     | -                  | 11.3±6.6      | 6.8±8.1    | 0.73                | <b>0.100</b>       | 202902_s_at                         | 0.39  | 0.129        |
| Cell surface glycoprotein MUC18            | MUC18_HUMAN   | MCAM     | -                  | -            | -     | -                  | 0.7±0.8       | 1.7±2      | -1.32               | 0.164              | 209086_x_at; 210869_s_at            | -0.26 | 0.225        |
| Chitinase-3-like protein 1                 | CH3L1_HUMAN   | CH3L1    | -                  | -            | -     | -                  | 2.2±3.5       | 0.5±0.8    | 1.18                | <b>0.045</b>       | 209395_at; 209396_s_at              | 0.72  | <b>0.074</b> |
| Clusterin                                  | CLU_HUMAN     | CLU      | 258.3±48.1         | 289.2±53.7   | -0.16 | 0.325              | -             | -          | -                   | -                  | 222043_at; 208791_at; 208792_s_at   | -0.26 | 0.187        |
| Collagen alpha-1 (I)                       | CO1A1_HUMAN   | COL1A1   | 602.7±179.1        | 687±196.8    | -0.19 | 0.275              | 27.5±6.8      | 31.3±10.1  | -0.19               | 0.576              | 202311_s_at; 202312_s_at            | 0.42  | 0.129        |
| Collagen alpha-1 (II)                      | CO3A1_HUMAN   | COL3A1   | 84.2±35.2          | 99.2±47.4    | -0.24 | 0.466              | 5.5±6.7       | 17.5±8.3   | -1.67               | <b>0.041</b>       | -                                   | -     | -            |
| Collagen alpha-1 (IV)                      | CO4A1_HUMAN   | COL4A1   | 24±7.7             | 24.2±10.3    | -0.01 | 0.984              | -             | -          | -                   | -                  | 211981_at                           | -0.03 | 0.882        |
| Collagen alpha-1 (V)                       | CO5A1_HUMAN   | COL5A1   | 65.2±26.7          | 72.8±20.8    | -0.16 | 0.663              | -             | -          | -                   | -                  | 212488_at; 203325_s_at; 212489_at   | 0.09  | 0.515        |
| Collagen alpha-1 (VI)                      | CO6A1_HUMAN   | COL6A1   | 386.8±44.1         | 412.3±64.4   | -0.09 | 0.557              | 5±4.1         | 5.2±4.8    | -0.05               | 0.913              | 212937_s_at; 212938_at; 212940_at   | -0.32 | 0.129        |
| Collagen alpha-1 (VIII)                    | CO8A1_HUMAN   | COL8A1   | 2±3.3              | 2.5±1.4      | -0.32 | 0.666              | -             | -          | -                   | -                  | 214587_at                           | -0.41 | 0.156        |
| Collagen alpha-1 (XIV)                     | COE1_HUMAN    | COL14A1  | 194.7±124.6        | 229±54.5     | -0.23 | 0.355              | 173.5±39.9    | 198.7±24   | -0.20               | 0.386              | 216865_at; 216866_s_at              | -0.27 | <b>0.074</b> |
| Collagen alpha-1 (XV)                      | COFA1_HUMAN   | COL15A1  | 46±18.3            | 47.3±14      | -0.04 | 0.918              | 12.7±4.8      | 8.3±4.4    | 0.60                | 0.258              | -                                   | -     | -            |
| Collagen alpha-1 (XVIII)                   | COIA1_HUMAN   | COL18A1  | 120.5±44.3         | 175.3±30.2   | -0.54 | 0.145              | 42.2±16.2     | 54.5±10.7  | -0.37               | 0.298              | 209081_s_at; 209082_s_at            | -0.28 | 0.163        |
| Collagen alpha-1 (XII)                     | COCA1_HUMAN   | COL12A1  | 131.7±67.4         | 159.8±70.5   | -0.28 | 0.436              | 206.7±54      | 189.8±35.7 | 0.12                | 0.586              | 231879_at; 231766_s_at; 234951_s_at | -0.21 | 0.269        |
| Collagen alpha-2 (I)                       | CO1A2_HUMAN   | COL1A2   | 504.2±127.9        | 578±175.7    | -0.20 | 0.306              | 24.7±4.7      | 23.5±3.6   | 0.07                | 0.814              | -                                   | -     | -            |
| Collagen alpha-2 (IV)                      | CO4A2_HUMAN   | COL4A2   | 38.3±13.5          | 54.2±24.3    | -0.50 | 0.257              | -             | -          | -                   | -                  | 211966_at                           | -0.36 | 0.129        |
| Collagen alpha-2 (V)                       | CO5A2_HUMAN   | COL5A2   | 79.5±39.6          | 78.8±51.1    | 0.01  | 0.930              | -             | -          | -                   | -                  | 221729_at; 221730_at                | 0.14  | 0.414        |
| Collagen alpha-2 (VI)                      | CO6A2_HUMAN   | COL6A2   | 145±49.1           | 177.3±41.6   | -0.29 | 0.244              | 3.8±2.5       | 4.7±3.1    | -0.28               | 0.598              | 209156_s_at                         | -0.18 | 0.188        |
| Collagen alpha-2 (VIII)                    | CO8A2_HUMAN   | COL8A2   | 2.5±3.7            | 3.3±3.1      | -0.41 | 0.587              | -             | -          | -                   | -                  | 52651_at; 221900_at                 | -0.17 | 0.156        |
| Collagen alpha-3 (VI)                      | CO6A3_HUMAN   | COL6A3   | 1144.5±120.5       | 1174.8±152.3 | -0.04 | 0.828              | 36.3±12.4     | 38±19.4    | -0.06               | 0.855              | 201438_at                           | 0.34  | <b>0.074</b> |
| Collagen triple helix repeat containing 1  | CTHR1_HUMAN   | CTHRC1   | 0.7±1              | 2.5±1.6      | -1.91 | <b>0.074</b>       | 1.8±2.6       | 5±2.5      | -1.45               | <b>0.035</b>       | -                                   | -     | -            |
| Decorin                                    | DCN_HUMAN     | DCN      | 87.5±14.5          | 111±47       | -0.34 | 0.144              | 2.5±2.3       | 3.2±3.7    | -0.34               | 0.468              | 209335_at                           | 0.23  | 0.261        |
| Dermatopontin                              | DERM_HUMAN    | DPT      | 70.8±25.4          | 88.7±13.9    | -0.32 | 0.129              | 5.7±2.9       | 6.7±4.8    | -0.23               | 0.455              | 213068_at; 213071_at; 207977_s_at   | -0.33 | 0.129        |
| EMILIN-2                                   | EMILIN2_HUMAN | EMILIN2  | 2.2±3.9            | 0.7±0.8      | 1.70  | 0.200              | -             | -          | -                   | -                  | 224374_s_at; 242288_s_at; 221980_at | 0.39  | 0.128        |
| Extracellular superoxide dismutase [Cu-Zn] | SODE_HUMAN    | SOD3     | 29±10.7            | 36.3±6.2     | -0.33 | 0.224              | 38.8±12.1     | 38.8±11.2  | 0.00                | 0.961              | 205236_x_at                         | -0.30 | 0.129        |
| Fibrillin 1                                | FBN1_HUMAN    | FBN1     | 4.3±5.9            | 0.8±1.3      | 2.38  | 0.161              | -             | -          | -                   | -                  | 202765_s_at                         | 0.01  | 0.987        |
| Fibromodulin                               | FMOD_HUMAN    | FMOD     | 25±12.2            | 21.7±8.9     | 0.21  | 0.481              | 5.8±10.2      | 6±5.5      | -0.04               | 0.898              | 202709_at                           | -0.10 | 0.666        |
| Fibronectin                                | FN1_HUMAN     | FN1      | 956±178.5          | 906.2±97.5   | 0.08  | 0.613              | 386.7±139.9   | 256±74.5   | 0.59                | <b>0.052</b>       | 214702_at                           | 0.10  | 0.584        |
| Fibulin 1                                  | FBLN1_HUMAN   | FBLN1    | 13±16.1            | 14.5±6.3     | -0.16 | 0.733              | 43.5±14.5     | 45.2±7.1   | -0.05               | 0.805              | 207835_at; 201787_at; 202995_s_at   | -0.09 | 0.422        |
| Fibulin 2                                  | FBLN2_HUMAN   | FBLN2    | -                  | -            | -     | -                  | 31±16.5       | 34.2±16.8  | -0.14               | 0.640              | 203886_s_at                         | 0.12  | 0.470        |
| Fibulin 3                                  | FBLN3_HUMAN   | EFEMP1   | -                  | -            | -     | -                  | 189.5±35.1    | 200.5±21.6 | -0.08               | 0.554              | 201843_s_at                         | -0.07 | 0.661        |
| Fibulin 5                                  | FBLN5_HUMAN   | FBLN5    | 4±4.4              | 3.5±3        | 0.19  | 0.703              | 21.5±7.6      | 24.3±7.8   | -0.18               | 0.497              | 203088_at                           | -0.40 | 0.142        |
| Galectin 1                                 | LEG1_HUMAN    | LGALS1   | 21.3±7.4           | 25.2±8.4     | -0.24 | 0.336              | 47±7.6        | 46±9.4     | 0.03                | 0.799              | -                                   | -     | -            |
| Galectin 3                                 | LEG3_HUMAN    | LGALS3   | 40.3±10.3          | 38.3±10.9    | 0.07  | 0.703              | 10±2.9        | 8.8±5.5    | 0.18                | 0.513              | -                                   | -     | -            |
| Galectin-3-binding protein                 | LG3BP_HUMAN   | LGALS3BP | 45.5±17.4          | 33.5±21.2    | 0.44  | 0.200              | 9.5±11.4      | 2.5±2.8    | 1.93                | <b>0.020</b>       | 200923_at                           | -0.17 | 0.206        |
| Glia-derived nexin                         | GDN_HUMAN     | SERPINE2 | 9.7±9.2            | 10.5±3.8     | -0.12 | 0.775              | -             | -          | -                   | -                  | 212190_at                           | -0.41 | <b>0.074</b> |
| Hemicentin 1                               | HMCN1_HUMAN   | HMCN1    | -                  | -            | -     | -                  | 7.8±8.1       | 6±2.3      | 0.38                | 0.604              | 235944_at                           | -0.42 | 0.129        |

|                                                                          |              |             |             |             |       |              |            |            |       |              |                                              |       |              |
|--------------------------------------------------------------------------|--------------|-------------|-------------|-------------|-------|--------------|------------|------------|-------|--------------|----------------------------------------------|-------|--------------|
| Hyaluronan and proteoglycan link protein 1                               | HPLN1_HUMAN  | HAPLN1      | 23.7±17.9   | 40.5±22.3   | -0.78 | <b>0.060</b> | -          | -          | -     | -            | 230895_at; 230204_at; 205523_at; 205524_s_at | -0.27 | 0.237        |
| Hyaluronan and proteoglycan link protein 3                               | HPLN3_HUMAN  | HAPLN3      | 26.2±17.5   | 31.7±13.1   | -0.28 | 0.397        | -          | -          | -     | -            | -                                            | -     | -            |
| Inactive carboxypeptidase-like protein X2                                | CPXM2_HUMAN  | CPXM2       | 13.2±5.2    | 14.2±5.5    | -0.11 | 0.789        | -          | -          | -     | -            | 236144_at                                    | -0.32 | 0.129        |
| Insulin-like growth factor binding protein 7                             | IBP7_HUMAN   | IGFBP7      | 48.7±15.7   | 44.7±11.8   | 0.12  | 0.548        | 26±11.6    | 29±1.1     | -0.16 | 0.471        | -                                            | -     | -            |
| Insulin-like growth factor-binding protein complex acid labile subunit   | ALS_HUMAN    | IGFALS      | -           | -           | -     | -            | 8.2±2.2    | 7.5±2.1    | 0.12  | 0.719        | 215712_s_at                                  | -0.08 | 0.580        |
| Intercellular adhesion molecule 1                                        | ICAM1_HUMAN  | ICAM1       | 3±2.7       | 1±1.7       | 1.58  | 0.126        | -          | -          | -     | -            | 202637_s_at; 202638_s_at                     | 0.33  | <b>0.093</b> |
| Kallistatin                                                              | KAIN_HUMAN   | SERPINA4    | 3±3.5       | 5.2±8.5     | -0.78 | 0.250        | 2±1.9      | 4.8±1.9    | -1.27 | <b>0.074</b> | 213874_at                                    | -0.10 | 0.397        |
| Lactadherin                                                              | MFGM_HUMAN   | MFGE8       | 132±12.6    | 154.7±37.2  | -0.23 | 0.255        | -          | -          | -     | -            | -                                            | -     | -            |
| Laminin subunit alpha-5                                                  | LAMA5_HUMAN  | LAMA5       | 10.5±11.3   | 16.5±6.3    | -0.65 | 0.437        | -          | -          | -     | -            | 210150_s_at                                  | -0.18 | 0.216        |
| Laminin subunit beta-1                                                   | LAMB1_HUMAN  | LAMB1       | 10±8.9      | 5.2±3       | 0.95  | 0.253        | -          | -          | -     | -            | -                                            | -     | -            |
| Laminin subunit beta-2                                                   | LAMB2_HUMAN  | LAMB2       | 32±7.2      | 44.8±16.2   | -0.49 | 0.327        | -          | -          | -     | -            | 216264_s_at                                  | -0.07 | 0.618        |
| Laminin subunit gamma-1                                                  | LAMC1_HUMAN  | LAMC1       | 53.5±19.3   | 57.2±15.3   | -0.10 | 0.801        | -          | -          | -     | -            | -                                            | -     | -            |
| Latent-transforming growth factor beta-binding protein 1                 | LTBP1_HUMAN  | LTBP1       | 12.5±7.5    | 14.7±5      | -0.23 | 0.684        | -          | -          | -     | -            | -                                            | -     | -            |
| Latent-transforming growth factor beta-binding protein 2                 | LTBP2_HUMAN  | LTBP2       | 36.3±31.7   | 36.8±11.1   | -0.02 | 0.967        | 47.2±10    | 50.8±7.8   | -0.11 | 0.712        | 223690_at; 223690_at                         | -0.29 | 0.129        |
| Latent-transforming growth factor beta-binding protein 4                 | LTBP4_HUMAN  | LTBP4       | 17.2±7.6    | 16.2±2.9    | 0.09  | 0.832        | 5.5±7.6    | 5.7±2.9    | -0.04 | 0.935        | 204442_x_at; 213176_s_at                     | -0.45 | <b>0.074</b> |
| Lumican                                                                  | LUM_HUMAN    | LUM         | 206.2±54.8  | 241±33.9    | -0.23 | 0.179        | 48.2±9.4   | 49.3±11.8  | -0.03 | 0.837        | 229554_at                                    | 0.34  | 0.145        |
| Macrophage migration inhibitory factor (glycosylation-inhibiting factor) | MIF_HUMAN    | MIF         | -           | -           | -     | -            | 17.5±9     | 15.5±2.6   | 0.18  | 0.375        | -                                            | -     | -            |
| Mast cell carboxypeptidase A                                             | CPA3_HUMAN   | CPA3        | 1.2±2.4     | 5.8±5.9     | -2.32 | <b>0.034</b> | -          | -          | -     | -            | 205624_at                                    | 0.29  | 0.372        |
| Matrin-2                                                                 | MATN2_HUMAN  | MATN2       | 1.7±1.6     | 1.8±2.9     | -0.14 | 0.892        | -          | -          | -     | -            | -                                            | -     | -            |
| Matrix Gla protein                                                       | MGP_HUMAN    | MGP         | 14.8±7.6    | 16.3±9.2    | -0.14 | 0.555        | 23.2±5.8   | 24.2±8.8   | -0.06 | 0.694        | -                                            | -     | -            |
| Matrix metalloproteinase 12                                              | MMP12_HUMAN  | MMP12       | -           | -           | -     | -            | 5.5±1      | 5.8±6.1    | -0.22 | 0.576        | -                                            | -     | -            |
| Matrix metalloproteinase 2                                               | MMP2_HUMAN   | MMP2        | -           | -           | -     | -            | 5.3±3.6    | 5.5±2.1    | -0.04 | 0.907        | -                                            | -     | -            |
| Matrix metalloproteinase 9                                               | MMP9_HUMAN   | MMP9        | 3±3.2       | 1.5±2.3     | 1.00  | 0.264        | 9.8±5.7    | 4.2±4.8    | 1.24  | <b>0.064</b> | 203936_s_at                                  | 0.70  | <b>0.093</b> |
| Metalloproteinase inhibitor 1                                            | TIMP1_HUMAN  | TIMP1       | 12.2±8.9    | 10.2±8.8    | 0.26  | 0.415        | 4±2.8      | 2.2±1.3    | 0.88  | <b>0.099</b> | -                                            | -     | -            |
| Metalloproteinase inhibitor 2                                            | TIMP2_HUMAN  | TIMP2       | 2.7±1.8     | 3.5±1.6     | -0.39 | 0.460        | 5.7±3.3    | 2.5±1.9    | 2.11  | <b>0.045</b> | 203167_at                                    | 0.19  | 0.181        |
| Metalloproteinase inhibitor 3                                            | TIMP3_HUMAN  | TIMP3       | 7.3±5.5     | 19.2±11.8   | -1.39 | <b>0.016</b> | -          | -          | -     | -            | 201147_s_at; 201148_s_at; 201149_s_at        | 0.33  | 0.145        |
| Mimecan                                                                  | MIME_HUMAN   | OGN         | 140.7±30.1  | 170.5±20.3  | -0.28 | 0.145        | 8±2.8      | 8.3±3.2    | -0.06 | 0.833        | 218730_s_at                                  | -0.46 | 0.129        |
| Neutrophil defensin 1                                                    | DEF1_HUMAN   | DEFA1       | 7.8±3.6     | 10.3±6.3    | -0.40 | 0.194        | -          | -          | -     | -            | 205033_s_at                                  | 0.09  | 0.782        |
| Nidogen 1                                                                | NID1_HUMAN   | NID1        | 19.8±13.1   | 34.7±11.6   | -0.81 | 0.142        | -          | -          | -     | -            | 202007_at; 202008_s_at                       | -0.10 | 0.641        |
| Nidogen 2                                                                | NID2_HUMAN   | NID2        | 8.5±4.7     | 10±4.4      | -0.23 | 0.681        | -          | -          | -     | -            | 204114_at                                    | 0.27  | 0.241        |
| Osteomodulin                                                             | OMD_HUMAN    | OMD         | 4.5±6.2     | 4.7±5.6     | -0.05 | 0.906        | -          | -          | -     | -            | 205907_s_at; 205908_s_at                     | -0.45 | <b>0.074</b> |
| Osteopontin                                                              | OSTP_HUMAN   | SPPT1       | 12±13.3     | 6.8±5.7     | 0.81  | 0.114        | 41.7±27.1  | 16±8.9     | 1.38  | <b>0.005</b> | -                                            | -     | -            |
| Perlecan                                                                 | POSTN_HUMAN  | POSTN       | 170.3±82.2  | 141±71.4    | 0.27  | 0.249        | 19.5±5.6   | 18.3±7.3   | 0.09  | 0.752        | 1555778_a_at                                 | 0.11  | 0.618        |
| Plasma protease C1 inhibitor                                             | IC1_HUMAN    | SERPINC1    | 355.8±138.9 | 477.8±157.4 | -0.43 | 0.180        | 104.5±34.2 | 81.3±12    | 0.36  | 0.323        | 201654_s_at                                  | -0.12 | 0.397        |
| Podocan                                                                  | PODN_HUMAN   | PODN        | 11.7±4.4    | 16.8±4.8    | -0.53 | 0.254        | -          | -          | -     | -            | -                                            | -     | -            |
| Procollagen C-endopeptidase enhancer                                     | PCOCT_HUMAN  | PCOLCE      | 10±3.3      | 19±6.4      | -0.93 | <b>0.098</b> | 47.8±12.8  | 44.7±12    | 0.10  | 0.610        | 226522_at                                    | -0.17 | 0.142        |
| Prolargin                                                                | PRELP_HUMAN  | PRELP       | 347.5±79.5  | 404.2±50.5  | -0.22 | 0.154        | -          | -          | -     | -            | 37022_at                                     | -0.18 | 0.145        |
| Prosaposin                                                               | SAP_HUMAN    | PSAP        | -           | -           | -     | -            | 15±4.5     | 20.5±7.3   | -0.45 | 0.208        | 200866_s_at                                  | 0.25  | 0.145        |
| Protein APOC4-APOC2                                                      | K7ER74_HUMAN | APOC4-APOC2 | 1.2±1.6     | 1.3±2.4     | -0.19 | 0.764        | -          | -          | -     | -            | -                                            | -     | -            |
| Protein S100-A10                                                         | S10AA_HUMAN  | S100A10     | 0.5±0.8     | 0.7±0.8     | -0.41 | 0.545        | 6.3±5      | 7.7±6.6    | -0.28 | 0.298        | -                                            | -     | -            |
| Protein S100-A11                                                         | S10AB_HUMAN  | S100A11     | -           | -           | -     | -            | 13±2       | 12.3±4.5   | 0.08  | 0.673        | -                                            | -     | -            |
| Protein S100-A4                                                          | S10A4_HUMAN  | S100A4      | 1.3±1       | 1.3±1.6     | 0.00  | 0.992        | 12.2±5.6   | 10.5±3.3   | 0.21  | 0.333        | -                                            | -     | -            |
| Protein S100-A6                                                          | S10A6_HUMAN  | S100A6      | -           | -           | -     | -            | 5.7±4.5    | 6±5.2      | -0.08 | 0.712        | -                                            | -     | -            |
| Protein S100-A8                                                          | S10A8_HUMAN  | S100A8      | -           | -           | -     | -            | 29.2±13.8  | 18.2±7.1   | 0.68  | <b>0.019</b> | 202917_s_at                                  | 0.53  | <b>0.093</b> |
| Protein S100-A9                                                          | S10A9_HUMAN  | S100A9      | 5.3±6.9     | 5.3±7.6     | 0.00  | 0.975        | 36.2±24.1  | 16.8±18.6  | 1.10  | <b>0.004</b> | 203535_at                                    | 0.50  | <b>0.074</b> |
| Secreted frizzled-related protein 3                                      | SFRP3_HUMAN  | FRZB        | 4±3         | 5±2.4       | -0.32 | 0.502        | -          | -          | -     | -            | 244419_at; 203698_s_at                       | -0.52 | <b>0.074</b> |
| Secreted phosphoprotein 24                                               | SPP24_HUMAN  | SPP2        | 4.3±4.2     | 11.2±13.4   | -1.37 | <b>0.036</b> | -          | -          | -     | -            | 214478_at                                    | 0.00  | 0.979        |
| Serine protease HTRA1                                                    | HTRA1_HUMAN  | HTRA1       | 72±22.7     | 93.3±8.1    | -0.37 | 0.182        | -          | -          | -     | -            | -                                            | -     | -            |
| Serum amyloid A-4 protein                                                | SAA4_HUMAN   | SAA2-SAA4   | 12.7±13.1   | 3.8±5.6     | 1.72  | <b>0.008</b> | -          | -          | -     | -            | 207096_at                                    | 0.06  | 0.439        |
| Serum amyloid P component                                                | SAMP_HUMAN   | APCS        | 284.8±73.9  | 374.7±64.4  | -0.40 | <b>0.035</b> | 96.5±24.8  | 111.5±25   | -0.21 | 0.199        | 206350_at                                    | 0.00  | 0.998        |
| Spondin 1                                                                | SPON1_HUMAN  | SPON1       | -           | -           | -     | -            | 1.8±3.6    | 3.2±4.6    | -0.79 | -            | -                                            | -     | -            |
| Stromal cell-derived factor 1                                            | SDF1_HUMAN   | CXCL12      | 4.2±1.9     | 3.8±0.8     | 0.12  | 0.686        | -          | -          | -     | -            | 203666_at                                    | -0.03 | 0.859        |
| Target of Nesh-SH3                                                       | TARSH_HUMAN  | ABI3BP      | -           | -           | -     | -            | 4.2±4      | 5±6.1      | -0.26 | 0.621        | 223395_at                                    | 0.14  | 0.439        |
| Tenascin C                                                               | TENA_HUMAN   | TNC         | 501.2±161.5 | 398.2±109   | 0.33  | 0.179        | 91.2±33.9  | 62.3±31.7  | 0.55  | 0.146        | 201645_at                                    | 0.46  | <b>0.074</b> |
| Tenascin XB                                                              | TENX_HUMAN   | TNXB        | 108.3±64.1  | 121±58.1    | -0.16 | 0.662        | -          | -          | -     | -            | 217413_s_at                                  | 0.17  | 0.175        |
| Tetranectin                                                              | TETN_HUMAN   | CLEC3B      | 16±8.5      | 21±7        | -0.39 | 0.208        | 26.7±10.2  | 41.7±9.3   | -0.64 | <b>0.036</b> | 205200_at                                    | 0.14  | 0.430        |
| Thrombospondin 1                                                         | THBS1_HUMAN  | THBS1       | 47±26.2     | 40.5±32.6   | 0.21  | 0.524        | 202±98.2   | 173.8±99.9 | 0.22  | 0.289        | -                                            | -     | -            |
| Thrombospondin 2                                                         | TSP2_HUMAN   | THBS2       | 68.7±53.9   | 45.8±26.4   | 0.58  | 0.154        | 87.7±30.6  | 64.3±23.9  | 0.45  | 0.150        | -                                            | -     | -            |
| Thrombospondin 3                                                         | TSP3_HUMAN   | THBS3       | -           | -           | -     | -            | 0.7±1.2    | 2.2±2      | -1.70 | 0.123        | -                                            | -     | -            |
| Thrombospondin 4                                                         | TSP4_HUMAN   | THBS4       | -           | -           | -     | -            | 2±2.2      | 2.2±2.7    | -0.12 | 0.845        | -                                            | -     | -            |
| Transforming growth factor-beta-induced protein ig-h3                    | BGH3_HUMAN   | TGFB1       | 36±18.7     | 39.3±11.1   | -0.13 | 0.695        | -          | -          | -     | -            | 204776_at                                    | -0.07 | 0.414        |
| Transferrin                                                              | TTR_HUMAN    | TTR         | 27.3±16.7   | 22.7±13.5   | 0.27  | 0.264        | -          | -          | -     | -            | 209660_at                                    | -0.01 | 0.962        |
| Trypsin beta-2                                                           | TRYB2_HUMAN  | TPSB2       | 6±5.6       | 6.3±3.4     | -0.08 | 0.857        | -          | -          | -     | -            | -                                            | -     | -            |
| Tubulointerstitial nephritis antigen-like 1                              | TINAL_HUMAN  | TINAGL1     | 59.3±15.4   | 66±4        | -0.16 | 0.473        | -          | -          | -     | -            | 219058_x_at                                  | -0.20 | 0.129        |
| Verican                                                                  | CSPG2_HUMAN  | VCAN        | 471.8±111.6 | 535.7±79.4  | -0.18 | 0.421        | 74±34.5    | 74±13.8    | 0.00  | 0.960        | 211571_s_at                                  | -0.22 | 0.175        |
| Vitronectin                                                              | VTNC_HUMAN   | VTN         | 222.3±44.6  | 238.7±49.8  | -0.10 | 0.528        | 65.5±33    | 48±19.8    | 0.45  | 0.108        | 204534_at                                    | 0.04  | 0.596        |
| von Willebrand factor                                                    | VWF_HUMAN    | VWF         | -           | -           | -     | -            | 2.8±4.1    | 4.2±3.9    | -0.56 | 0.495        | 202112_at                                    | 0.30  | 0.162        |

**Supplementary Table 3. List of ECM proteins identified in human vascular SMC layers.**

| Identified ECM proteins                                              | Accession | Entry name  | MW (kD) | Identified in plaque |
|----------------------------------------------------------------------|-----------|-------------|---------|----------------------|
|                                                                      | Number    |             |         |                      |
| 72 kDa type IV collagenase                                           | P08253    | MMP2_HUMAN  | 74      | yes                  |
| Adipocyte plasma membrane-associated protein                         | Q9HDC9    | APMAP_HUMAN | 46      |                      |
| Agrin                                                                | O00468    | AGRIN_HUMAN | 217     | yes                  |
| Alpha-2-HS-glycoprotein                                              | P02765    | FETUA_HUMAN | 39      |                      |
| Alpha-2-macroglobulin receptor-associated protein                    | P30533    | AMRP_HUMAN  | 41      |                      |
| Annexin A2                                                           | P07355    | ANXA2_HUMAN | 39      | yes                  |
| Basement membrane-specific heparan sulfate proteoglycan core protein | P98160    | PGBM_HUMAN  | 469     | yes                  |
| Biglycan                                                             | P21810    | PGS1_HUMAN  | 42      | yes                  |
| Cadherin-13                                                          | P55290    | CAD13_HUMAN | 78      |                      |
| Cadherin-2                                                           | P19022    | CADH2_HUMAN | 100     |                      |
| Calpain small subunit 1                                              | P04632    | CPNS1_HUMAN | 28      |                      |
| Calumenin                                                            | O43852    | CALU_HUMAN  | 37      |                      |
| Carboxypeptidase Q                                                   | Q9Y646    | CBPQ_HUMAN  | 52      |                      |
| Cartilage-associated protein                                         | O75718    | CRTAP_HUMAN | 47      |                      |
| Cathepsin B                                                          | P07858    | CATB_HUMAN  | 38      | yes                  |
| Cathepsin D                                                          | P07339    | CATD_HUMAN  | 45      | yes                  |
| Cathepsin L1                                                         | P07711    | CATL1_HUMAN | 38      |                      |
| Cathepsin Z                                                          | Q9UBR2    | CATZ_HUMAN  | 34      |                      |
| Cell migration-inducing and hyaluronan-binding protein               | Q8WUJ3    | CEMIP_HUMAN | 153     |                      |
| Collagen alpha-1(I)                                                  | P02452    | CO1A1_HUMAN | 139     | yes                  |
| Collagen alpha-1(III)                                                | P02461    | CO3A1_HUMAN | 139     | yes                  |
| Collagen alpha-1(V)                                                  | P20908    | CO5A1_HUMAN | 184     | yes                  |
| Collagen alpha-1(VI)                                                 | P12109    | CO6A1_HUMAN | 109     | yes                  |
| Collagen alpha-2(I)                                                  | P08123    | CO1A2_HUMAN | 129     | yes                  |
| Collagen alpha-2(V)                                                  | P05997    | CO5A2_HUMAN | 145     |                      |
| Collagen alpha-2(VI)                                                 | P12110    | CO6A2_HUMAN | 109     | yes                  |
| Collagen alpha-3(VI)                                                 | P12111    | CO6A3_HUMAN | 344     | yes                  |
| Connective tissue growth factor                                      | P29279    | CTGF_HUMAN  | 38      |                      |
| EMILIN-1                                                             | Q9Y6C2    | EMIL1_HUMAN | 107     |                      |
| Epididymal secretory protein E1                                      | P61916    | NPC2_HUMAN  | 17      |                      |
| Fibrillin-1                                                          | P35555    | FBN1_HUMAN  | 312     | yes                  |
| Fibroblast growth factor 2                                           | P09038    | FGF2_HUMAN  | 31      |                      |
| Fibroleukin                                                          | Q14314    | FGL2_HUMAN  | 50      |                      |
| Fibronectin                                                          | P02751    | FN1_HUMAN   | 263     | yes                  |
| Fibulin-1                                                            | P23142    | FBLN1_HUMAN | 77      | yes                  |
| Fibulin-2                                                            | P98095    | FBLN2_HUMAN | 127     |                      |
| Follistatin-related protein 1                                        | Q12841    | FSTL1_HUMAN | 35      |                      |
| Galectin-1                                                           | P09382    | LEG1_HUMAN  | 15      | yes                  |
| Galectin-3                                                           | P17931    | LEG3_HUMAN  | 26      | yes                  |
| Galectin-3-binding protein                                           | Q08380    | LG3BP_HUMAN | 65      | yes                  |
| Gelsolin                                                             | P06396    | GELS_HUMAN  | 86      |                      |
| Glypican-1                                                           | P35052    | GPC1_HUMAN  | 62      |                      |
| Growth/differentiation factor 15                                     | Q99988    | GDF15_HUMAN | 34      |                      |
| Hepatoma-derived growth factor                                       | P51858    | HDSG_HUMAN  | 27      |                      |
| Insulin-like growth factor-binding protein 5                         | P24593    | IBP5_HUMAN  | 31      |                      |
| Insulin-like growth factor-binding protein 7                         | Q16270    | IBP7_HUMAN  | 29      | yes                  |
| Intercellular adhesion molecule 1                                    | P05362    | ICAM1_HUMAN | 58      | yes                  |
| Interstitial collagenase                                             | P03956    | MMP1_HUMAN  | 54      |                      |
| Isoform 2 of Glia-derived nexin                                      | P07093    | GDN_HUMAN   | 44      | yes                  |
| Lactadherin                                                          | Q08431    | MFGM_HUMAN  | 43      | yes                  |
| Leukocyte elastase inhibitor                                         | P30740    | ILEU_HUMAN  | 43      |                      |
| Macrophage migration inhibitory factor                               | P14174    | MIF_HUMAN   | 12      | yes                  |
| Mammalian ependymin-related protein 1                                | Q9UM22    | EPDR1_HUMAN | 25      |                      |
| Matrix Gla protein                                                   | P08493    | MGP_HUMAN   | 12      |                      |
| Metalloproteinase inhibitor 1                                        | P01033    | TIMP1_HUMAN | 23      | yes                  |
| Metalloproteinase inhibitor 2                                        | P16035    | TIMP2_HUMAN | 24      | yes                  |
| Metalloproteinase inhibitor 3                                        | P35625    | TIMP3_HUMAN | 24      |                      |
| Neudesin                                                             | Q9UMX5    | NENF_HUMAN  | 19      |                      |
| Nucleobindin-1                                                       | Q02818    | NUCB1_HUMAN | 54      |                      |
| Nucleobindin-2                                                       | P80303    | NUCB2_HUMAN | 50      |                      |
| Pentraxin-related protein PTX3                                       | P26022    | PTX3_HUMAN  | 42      |                      |
| Perilipin-2                                                          | Q99541    | PLIN2_HUMAN | 48      |                      |
| Periostin                                                            | Q15063    | POSTN_HUMAN | 93      |                      |
| Plasminogen activator inhibitor 1                                    | P05121    | PAI1_HUMAN  | 45      |                      |
| Procollagen C-endopeptidase enhancer 1                               | Q15113    | PCOC1_HUMAN | 48      | yes                  |
| Procollagen galactosyltransferase 1                                  | Q8NBJ5    | GT251_HUMAN | 72      |                      |
| Procollagen-lysine,2-oxoglutarate 5-dioxygenase 1                    | Q02809    | PLOD1_HUMAN | 84      |                      |
| Procollagen-lysine,2-oxoglutarate 5-dioxygenase 2                    | O00469    | PLOD2_HUMAN | 85      |                      |
| Procollagen-lysine,2-oxoglutarate 5-dioxygenase 3                    | O60568    | PLOD3_HUMAN | 85      |                      |
| Prolow-density lipoprotein receptor-related protein 1                | Q07954    | LRP1_HUMAN  | 505     |                      |
| Prosaposin                                                           | P07602    | SAP_HUMAN   | 58      |                      |
| Protein S100-A10                                                     | P60903    | S10AA_HUMAN | 11      | yes                  |
| Protein S100-A11                                                     | P31949    | S10AB_HUMAN | 12      | yes                  |
| Protein S100-A6                                                      | P06703    | S10A6_HUMAN | 10      | yes                  |
| Protein S100-A7                                                      | P31151    | S10A7_HUMAN | 11      |                      |
| Protein S100-A8                                                      | P05109    | S10A8_HUMAN | 11      | yes                  |
| Puromycin-sensitive aminopeptidase                                   | P55786    | PSA_HUMAN   | 103     |                      |
| Serine protease HTRA1                                                | Q92743    | HTRA1_HUMAN | 51      | yes                  |
| Serpin B6                                                            | P35237    | SPB6_HUMAN  | 43      |                      |
| Serpin H1                                                            | P50454    | SERP_HUMAN  | 46      |                      |
| SPARC                                                                | P09486    | SPRC_HUMAN  | 35      |                      |
| Tenascin                                                             | P24821    | TENA_HUMAN  | 241     | yes                  |
| Testican-1                                                           | Q08629    | TICN1_HUMAN | 49      |                      |
| Thrombospondin-1                                                     | P07996    | TSP1_HUMAN  | 129     | yes                  |
| Thrombospondin-2                                                     | P35442    | TSP2_HUMAN  | 130     | yes                  |
| Thymosin beta-4                                                      | P62328    | TYB4_HUMAN  | 5       |                      |
| Transforming growth factor-beta-induced protein ig-h3                | Q15582    | BGH3_HUMAN  | 75      | yes                  |
| UPF0556 protein C19orf10                                             | Q969H8    | CS010_HUMAN | 19      |                      |
| Vasorin                                                              | Q6EMK4    | VASN_HUMAN  | 72      |                      |
| Versican core protein                                                | P13611    | CSPG2_HUMAN | 373     | yes                  |
| Vesicle-associated membrane protein 3                                | Q15836    | VAMP3_HUMAN | 11      |                      |
| Vesicle-associated membrane protein-associated protein A             | Q9POL0    | VAPA_HUMAN  | 28      |                      |
| Vinculin                                                             | P18206    | VINC_HUMAN  | 124     |                      |

**Supplementary Table 4. ECM proteins identified in the secretomes of control and lipid-loaded human vascular SMCs.**

| Identified ECM Proteins (94)                             | Accession Number | Uniprot Name       | MW (kD)    | Control           | Lipid Loaded      | Ratio (log2) | t-test p-value | Identified in plaque |
|----------------------------------------------------------|------------------|--------------------|------------|-------------------|-------------------|--------------|----------------|----------------------|
|                                                          |                  |                    |            | Average± SD (n=4) | Average± SD (n=4) |              |                |                      |
| 72 kDa type IV collagenase                               | P08253           | MMP2_HUMAN         | 74         | 40.4±20.0         | 47.5±14.2         | 0.23         | 0.529          | yes                  |
| Adipocyte enhancer-binding protein 1                     | Q8IUJ7           | AEBP1_HUMAN        | 131        | 0.6±0.7           | 5.5±4.1           | 3.17         | 0.133          | yes                  |
| Aggrin                                                   | O00468           | AGRIN_HUMAN        | 215        | 3.8±2.8           | 8.1±3.3           | 1.09         | 0.240          | yes                  |
| Alpha-1-acid glycoprotein 1                              | P02763           | A1AG1_HUMAN        | 24         | 2.9±5.7           | 0.0±0.0           | n/a          | 0.391          |                      |
| Alpha-1-acid glycoprotein 2                              | P19652           | A1AG2_HUMAN        | 24         | 1.5±2.9           | 0.0±0.0           | n/a          | 0.391          |                      |
| Aminopeptidase N                                         | P15144           | AMPN_HUMAN         | 110        | 0.2±0.3           | 1.0±0.9           | 2.65         | 0.123          |                      |
| Amyloid beta A4 protein                                  | P05067           | A4_HUMAN           | 87         | 0.5±1.1           | 4.0±0.4           | 2.89         | 0.008          |                      |
| Annexin A2                                               | P07355           | ANXA2_HUMAN        | 39         | 37.7±6.4          | 49.6±11.9         | 0.40         | 0.272          | yes                  |
| Apolipoprotein D                                         | P05090           | APOD_HUMAN         | 21         | 3.1±3.2           | 0.0±0.0           | n/a          | 0.147          |                      |
| Apolipoprotein E                                         | P02649           | APOE_HUMAN         | 36         | 0.5±1.1           | 1.3±2.1           | 1.27         | 0.614          |                      |
| Biglycan                                                 | P21810           | PGS1_HUMAN         | 42         | 9.3±4.9           | 16.3±9.9          | 0.81         | 0.127          | yes                  |
| Cadherin-13                                              | P55290           | CAD13_HUMAN        | 78         | 0.6±0.7           | 3.3±2.7           | 2.55         | 0.079          |                      |
| Cadherin-2                                               | P19022           | CADH2_HUMAN        | 100        | 0.0±0.0           | 0.5±0.7           | n/a          | 0.244          |                      |
| Calmodulin                                               | P62158           | CALM_HUMAN         | 17         | 6.2±4.8           | 10.3±4.3          | 0.74         | 0.112          |                      |
| Calnexin                                                 | P27824           | CALX_HUMAN         | 68         | 0.0±0.0           | 0.5±1.0           | n/a          | 0.391          |                      |
| <b>Cathepsin B *</b>                                     | <b>P07858</b>    | <b>CATB_HUMAN</b>  | <b>38</b>  | <b>4.9±3.5</b>    | <b>8.1±3.7</b>    | <b>0.73</b>  | <b>0.084</b>   | <b>yes</b>           |
| Cathepsin D                                              | P07339           | CATD_HUMAN         | 45         | 1.4±2.9           | 6.5±3.8           | 2.18         | 0.133          | yes                  |
| Clusterin                                                | P10909           | CLUS_HUMAN         | 52         | 6.2±7.0           | 8.5±7.7           | 0.47         | 0.226          | yes                  |
| Collagen alpha-1(I)                                      | P02452           | CO1A1_HUMAN        | 139        | 216.2±93.7        | 289.6±91.3        | 0.42         | 0.006          | yes                  |
| <b>Collagen alpha-1(III) *</b>                           | <b>P02461</b>    | <b>CO3A1_HUMAN</b> | <b>139</b> | <b>41.4±20.1</b>  | <b>28.9±10.8</b>  | <b>-0.52</b> | <b>0.144</b>   | <b>yes</b>           |
| Collagen alpha-1(V)                                      | P20908           | CO5A1_HUMAN        | 184        | 0.0±0.0           | 2.7±2.1           | n/a          | 0.082          | yes                  |
| Collagen alpha-1(VI)                                     | P12109           | CO6A1_HUMAN        | 109        | 22.9±14.2         | 26.5±19.1         | 0.21         | 0.472          | yes                  |
| Collagen alpha-1(XII)                                    | Q99715           | COCA1_HUMAN        | 333        | 20.7±10.5         | 35.1±28.3         | 0.76         | 0.229          | yes                  |
| Collagen alpha-1(XV)                                     | P39059           | COFA1_HUMAN        | 142        | 0.0±0.0           | 1.2±2.4           | n/a          | 0.391          |                      |
| Collagen alpha-2(I)                                      | P08123           | CO1A2_HUMAN        | 129        | 374.1±177.1       | 330.8±112.1       | -0.18        | 0.449          | yes                  |
| Collagen alpha-2(IV)                                     | P08572           | CO4A2_HUMAN        | 168        | 8.5±3.2           | 7.6±5.3           | -0.16        | 0.484          | yes                  |
| Collagen alpha-2(VI)                                     | P12110           | CO6A2_HUMAN        | 109        | 3.9±3.9           | 3.7±2.2           | -0.09        | 0.844          | yes                  |
| Collagen alpha-3(VI)                                     | P12111           | CO6A3_HUMAN        | 344        | 12.3±16.5         | 24.5±17.4         | 0.99         | 0.007          | yes                  |
| Collagen alpha-5(IV)                                     | P29400           | CO4A5_HUMAN        | 161        | 1.2±1.4           | 2.6±2.8           | 1.11         | 0.227          |                      |
| Connective tissue growth factor                          | P29279           | CTGF_HUMAN         | 38         | 4.4±4.1           | 9.5±10.4          | 1.10         | 0.497          |                      |
| Decorin                                                  | P07585           | PGS2_HUMAN         | 40         | 11.6±14           | 10.1±10.6         | -0.21        | 0.686          | yes                  |
| Endoplasmic reticulum chaperone protein                  | P14625           | ENPL_HUMAN         | 92         | 8.5±2.9           | 14.1±4.5          | 0.74         | 0.114          |                      |
| Epididymal secretory protein E1                          | P61916           | NPC2_HUMAN         | 17         | 1.6±1.9           | 3.3±2.4           | 1.05         | 0.105          |                      |
| Extracellular matrix protein 1                           | Q16610           | ECM1_HUMAN         | 61         | 1.2±2.4           | 0.4±0.5           | -1.65        | 0.479          |                      |
| Extracellular superoxide dismutase [Cu-Zn]               | P08294           | SODE_HUMAN         | 26         | 8.2±11.4          | 12.0±13.2         | 0.54         | 0.061          | yes                  |
| Fibrillin-1                                              | P35555           | FBN1_HUMAN         | 312        | 24.3±11.4         | 28.9±8.1          | 0.25         | 0.657          | yes                  |
| <b>Fibronectin *</b>                                     | <b>P02751</b>    | <b>FINC_HUMAN</b>  | <b>263</b> | <b>314.7±36.5</b> | <b>301.9±60.5</b> | <b>-0.06</b> | <b>0.368</b>   | <b>yes</b>           |
| Fibulin-1                                                | P23142           | FBLN1_HUMAN        | 77         | 3.9±4.0           | 10.2±12.8         | 1.38         | 0.258          | yes                  |
| Fibulin-2                                                | P98095           | FBLN2_HUMAN        | 127        | 5.6±7.4           | 2.9±5.3           | -0.93        | 0.184          |                      |
| Fibulin-3                                                | Q12805           | FBLN3_HUMAN        | 55         | 26.4±13.7         | 39.6±13.1         | 0.59         | 0.179          | yes                  |
| Fibulin-4                                                | O95967           | FBLN4_HUMAN        | 49         | 1.8±2.2           | 0.9±1.1           | -1.06        | 0.193          |                      |
| Follistatin                                              | P19883           | FST_HUMAN          | 38         | 6.3±5.4           | 3.2±3.7           | -0.98        | 0.324          |                      |
| Follistatin-related protein 1                            | Q12841           | FSTL1_HUMAN        | 35         | 22.0±6.9          | 21.4±9.7          | -0.04        | 0.902          |                      |
| Galectin-3                                               | P17931           | LEG3_HUMAN         | 26         | 0.0±0.0           | 2.1±2.5           | n/a          | 0.182          | yes                  |
| <b>Galectin-3-binding protein *</b>                      | <b>Q08380</b>    | <b>LG3BP_HUMAN</b> | <b>65</b>  | <b>4.4±2.2</b>    | <b>8.8±1.7</b>    | <b>0.99</b>  | <b>0.005</b>   | <b>yes</b>           |
| Gelsolin                                                 | P06396           | GELS_HUMAN         | 86         | 1.5±1.2           | 2.0±2.6           | 0.44         | 0.597          |                      |
| Glypican-1                                               | P35052           | GPC1_HUMAN         | 62         | 6.0±0.7           | 2.6±1.4           | 2.22         | 0.059          |                      |
| Glypican-6                                               | Q9Y625           | GPC6_HUMAN         | 63         | 0.0±0.0           | 1.4±1.8           | n/a          | 0.224          |                      |
| Hemopexin                                                | P02790           | HEMO_HUMAN         | 52         | 0.9±1.9           | 0.0±0.0           | n/a          | 0.391          |                      |
| Hyaluronan and proteoglycan link protein 1               | P10915           | HPLN1_HUMAN        | 40         | 0.9±1.8           | 4.4±8.7           | 2.27         | 0.391          |                      |
| Insulin-like growth factor-binding protein 4             | P22692           | IBP4_HUMAN         | 28         | 9.9±12.5          | 6.5±4.9           | -0.60        | 0.698          |                      |
| Insulin-like growth factor-binding protein 5             | P24593           | IBP5_HUMAN         | 31         | 3.5±4.0           | 2.9±2.6           | -0.27        | 0.746          |                      |
| Insulin-like growth factor-binding protein 6             | P24592           | IBP6_HUMAN         | 25         | 6.6±8.5           | 3.9±2.7           | -0.77        | 0.448          |                      |
| Insulin-like growth factor-binding protein 7             | Q16270           | IBP7_HUMAN         | 29         | 49.4±19.1         | 33.6±14.8         | -0.55        | 0.382          | yes                  |
| Integrin alpha-2                                         | P17301           | ITA2_HUMAN         | 129        | 2.7±3.2           | 5.1±3.9           | 0.91         | 0.122          |                      |
| Isoform 2 of Gli3-derived nexin                          | P07093           | GDN_HUMAN          | 44         | 32.5±24.9         | 66.7±31.9         | 1.04         | 0.570          | yes                  |
| Interstitial collagenase                                 | P03956           | MMP1_HUMAN         | 54         | 24.7±28.3         | 28.7±35.0         | 0.22         | 0.637          |                      |
| Lactadherin                                              | Q08431           | MFGM_HUMAN         | 43         | 4.7±5.6           | 15.2±23.9         | 1.68         | 0.361          | yes                  |
| Laminin subunit alpha-4                                  | Q16363           | LAMA4_HUMAN        | 203        | 4.9±6.2           | 5.5±5.7           | 0.17         | 0.181          |                      |
| Laminin subunit beta-1                                   | P07942           | LAMB1_HUMAN        | 198        | 3.3±2.9           | 3.8±2.9           | 0.22         | 0.634          | yes                  |
| Laminin subunit gamma-1                                  | P11047           | LAMC1_HUMAN        | 178        | 3.8±4.4           | 5.3±3.7           | 0.50         | 0.326          | yes                  |
| Latent-transforming growth factor beta-binding protein 1 | Q14766           | LTBP1_HUMAN        | 187        | 3.3±3.9           | 4.0±3.2           | 0.29         | 0.638          |                      |
| Latent-transforming growth factor beta-binding protein 2 | Q14767           | LTBP2_HUMAN        | 195        | 9.4±2.6           | 13.4±2.0          | 0.52         | 0.081          | yes                  |
| Lumican                                                  | P51884           | LUM_HUMAN          | 38         | 4.2±3.7           | 5.3±4.2           | 0.34         | 0.544          | yes                  |
| Lysyl oxidase homolog 2                                  | Q9Y4K0           | LOXL2_HUMAN        | 87         | 5.9±5.3           | 7.3±1.5           | 0.31         | 0.560          |                      |
| <b>Metalloproteinase inhibitor 1 *</b>                   | <b>P01033</b>    | <b>TIMP1_HUMAN</b> | <b>23</b>  | <b>25.3±14.5</b>  | <b>25.5±6.4</b>   | <b>0.01</b>  | <b>0.978</b>   | <b>yes</b>           |
| <b>Metalloproteinase inhibitor 2 *</b>                   | <b>P16035</b>    | <b>TIMP2_HUMAN</b> | <b>24</b>  | <b>23.7±6.8</b>   | <b>18.1±3.9</b>   | <b>-0.38</b> | <b>0.289</b>   | <b>yes</b>           |
| Pappalysin-1                                             | Q13219           | PAPP1_HUMAN        | 181        | 2.9±3.4           | 2.2±2.8           | -0.43        | 0.444          |                      |
| Pentraxin-related protein PTX3                           | P26022           | PTX3_HUMAN         | 42         | 24.9±22.1         | 51.5±31.6         | 1.05         | 0.027          |                      |
| Perlecan                                                 | B1ALD8           | B1ALD8_HUMAN       | 90         | 56.9±23.3         | 42.7±22.9         | -0.41        | 0.318          |                      |
| Perlecan                                                 | P98160           | PGBM_HUMAN         | 469        | 58.0±13.4         | 60.3±28.7         | 0.05         | 0.790          | yes                  |
| Plasminogen activator inhibitor 1                        | P05121           | PAI1_HUMAN         | 45         | 32.1±30.3         | 61±54.2           | 0.93         | 0.107          |                      |
| Proactivator polypeptide                                 | P07602           | SAP_HUMAN          | 58         | 0.0±0.0           | 7.8±6.7           | n/a          | 0.103          |                      |
| <b>Procollagen C-endopeptidase enhancer 1 *</b>          | <b>Q15113</b>    | <b>PCOC1_HUMAN</b> | <b>48</b>  | <b>20.6±9.3</b>   | <b>19.4±5.8</b>   | <b>-0.09</b> | <b>0.799</b>   | <b>yes</b>           |
| Procollagen-lysine,2-oxoglutarate 5-dioxygenase 1        | Q02809           | PLOD1_HUMAN        | 84         | 3.8±4.0           | 6.3±4.2           | 0.74         | 0.202          |                      |
| Procollagen-lysine,2-oxoglutarate 5-dioxygenase 3        | O60568           | PLOD3_HUMAN        | 85         | 0.0±0.0           | 0.3±0.7           | n/a          | 0.391          |                      |
| Prolow-density lipoprotein receptor-related protein 1    | Q07954           | LRP1_HUMAN         | 505        | 0.0±0.0           | 2.1±3.6           | n/a          | 0.320          |                      |
| Proteasome subunit beta type-5                           | P28074           | PSB5_HUMAN         | 28         | 3.2±3.8           | 2.9±1.9           | -0.14        | 0.853          |                      |
| Protein S100-A7                                          | P31151           | S10A7_HUMAN        | 11         | 4.4±4.3           | 1.4±1.2           | -1.71        | 0.237          |                      |
| <b>Protein S100-A8 *</b>                                 | <b>P05109</b>    | <b>S10A8_HUMAN</b> | <b>11</b>  | <b>6.3±8.0</b>    | <b>1.7±1.5</b>    | <b>-1.87</b> | <b>0.285</b>   | <b>yes</b>           |
| <b>Protein S100-A9 *</b>                                 | <b>P06702</b>    | <b>S10A9_HUMAN</b> | <b>13</b>  | <b>14.8±7.5</b>   | <b>9.2±10.1</b>   | <b>-0.69</b> | <b>0.300</b>   | <b>yes</b>           |
| Protein-lysine 6-oxidase                                 | P28300           | LYOX_HUMAN         | 47         | 10.9±9.0          | 5.5±3.2           | -0.98        | 0.296          |                      |
| Retinol-binding protein 4                                | P02753           | RET4_HUMAN         | 23         | 1.0±1.9           | 0.0±0.0           | n/a          | 0.391          |                      |
| Serine protease HTRA1                                    | Q92743           | HTRA1_HUMAN        | 51         | 1.2±1.4           | 2.5±3.4           | 1.05         | 0.445          | yes                  |
| Serpin H1                                                | P50454           | SERPH_HUMAN        | 46         | 11.8±5.2          | 8.7±5.1           | -0.44        | 0.501          |                      |
| SPARC                                                    | P09486           | SPRC_HUMAN         | 35         | 66.8±15.9         | 95.5±59.9         | 0.52         | 0.316          |                      |
| Syndecan-4                                               | P31431           | SDC4_HUMAN         | 22         | 0.0±0.0           | 1.1±1.3           | n/a          | 0.186          |                      |
| Tenascin                                                 | P24821           | TENA_HUMAN         | 241        | 0.0±0.0           | 3.1±5.9           | n/a          | 0.368          | yes                  |
| Testican-1                                               | Q08629           | TICN1_HUMAN        | 49         | 3.5±2.4           | 5.1±2.1           | 0.55         | 0.413          |                      |
| Thrombospondin-1                                         | P07996           | TSP1_HUMAN         | 129        | 59.8±30.9         | 83.8±44.8         | 0.49         | 0.336          | yes                  |
| Thrombospondin-2                                         | P35442           | TSP2_HUMAN         | 130        | 16.5±5.2          | 58.0±38.2         | 1.82         | 0.148          | yes                  |
| Transforming growth factor beta-1                        | P01137           | TGFB1_HUMAN        | 44         | 0.5±0.9           | 0.2±0.4           | -1.09        | 0.391          |                      |
| Transforming growth factor-beta-induced protein ig-h3    | Q15582           | BGH3_HUMAN         | 75         | 47.9±31.4         | 37.8±16.4         | -0.34        | 0.394          | yes                  |
| Vasorin                                                  | Q6EMK4           | VASN_HUMAN         | 72         | 0.4±0.9           | 1.2±1.4           | 1.44         | 0.371          |                      |
| Versican core protein                                    | P13611           | CSPG2_HUMAN        | 265        | 27.2±8.9          | 21.1±9.7          | -0.36        | 0.372          | yes                  |

Values are averages ± standard deviation of spectral counts. P-values were calculated based on paired t-tests.

**Supplementary Table 5: Baseline characteristics of subjects in the Bruneck Study (N=685).**

| <b>Characteristics</b>             | <b>Mean±SD or number(%)</b> |
|------------------------------------|-----------------------------|
| Age, years                         | 66.1±10.2                   |
| Female sex, n (%)                  | 355 (51.8)                  |
| Smoking, pack-years                | 12.7±17.4                   |
| Body mass index, kg/m <sup>2</sup> | 25.4±4.0                    |
| Diabetes mellitus, n (%)           | 79 (11.5)                   |
| Hypertension, n (%)                | 385 (56.2)                  |
| HDL-Cholesterol, mg/dL             | 57.3±15.2                   |
| LDL-Cholesterol, mg/dL             | 148.9±36.7                  |
| High-sensitivity CRP, mg/L         | 3.9±9.5                     |
| Atherosclerosis score, mm          | 3.9±5.5                     |

**Supplementary Table 6: Association between markers of plaque vulnerability and incipient and early atherosclerosis in the Bruneck Study (N=670).**

| Protein         | Incipient atherosclerosis |         |                        |         | Early atherosclerosis  |         |                        |         |
|-----------------|---------------------------|---------|------------------------|---------|------------------------|---------|------------------------|---------|
|                 | Model 1                   |         | Model 2                |         | Model 1                |         | Model 2*               |         |
|                 | Odds Ratio<br>(95% CI)    | P value | Odds Ratio<br>(95% CI) | P value | Odds Ratio<br>(95% CI) | P value | Odds Ratio<br>(95% CI) | P value |
| <b>FN1</b>      | 0.91 (0.72-1.16)          | 0.451   | 0.91 (0.71-1.18)       | 0.48    | 1.01 (0.84-1.21)       | 0.935   | 0.92 (0.75-1.13)       | 0.432   |
| <b>CTSD</b>     | 1.23 (0.94-1.60)          | 0.133   | 1.18 (0.88-1.57)       | 0.26    | 1.27 (1.04-1.55)       | 0.019   | 1.11 (0.88-1.39)       | 0.379   |
| <b>CALP</b>     | 0.97 (0.77-1.23)          | 0.814   | 0.94 (0.72-1.23)       | 0.65    | 1.16 (0.95-1.40)       | 0.143   | 0.98 (0.78-1.24)       | 0.873   |
| <b>LGALS3BP</b> | 1.32 (0.99-1.77)          | 0.057   | 1.25 (0.90-1.72)       | 0.18    | 1.38 (1.11-1.71)       | 0.004   | 1.13 (0.88-1.45)       | 0.341   |
| <b>MMP9</b>     | 0.89 (0.68-1.18)          | 0.419   | 0.91 (0.68-1.21)       | 0.52    | 1.00 (0.82-1.22)       | 0.991   | 0.93 (0.74-1.17)       | 0.567   |
| <b>CHI3L1</b>   | 1.14 (0.84-1.53)          | 0.411   | 1.06 (0.76-1.46)       | 0.75    | 1.13 (0.91-1.41)       | 0.282   | 0.95 (0.74-1.22)       | 0.668   |

Odds ratios (OR) are derived from logistic regression analysis and expressed for a 1-SD higher  $\log_e$  transformed level of given marker. CI denotes confidence interval. Incipient atherosclerosis refers to the development of first plaques in subjects free of atherosclerosis at baseline.

Model 1 was adjusted for age (years) and sex.

Model 2 was adjusted for age (years), sex, LDL cholesterol (mg/dL), HDL cholesterol (mg/dL), high-sensitivity C-reactive protein (mg/L), diabetes mellitus (0 vs 1), hypertension (0 vs 1), smoking (pack-years), body mass index ( $\text{kg}/\text{m}^2$ ).

\* Additionally adjusted for atherosclerosis score (mm).



**Supplementary Table 7: Association between markers of plaque vulnerability and advanced atherosclerosis (N=670) and cardiovascular disease (N=685) in the Bruneck Study.**

| Protein         | Advanced atherosclerosis |         |                        |         | Cardiovascular disease   |         |                          |         |
|-----------------|--------------------------|---------|------------------------|---------|--------------------------|---------|--------------------------|---------|
|                 | Model 1                  |         | Model 2*               |         | Model 1                  |         | Model 2                  |         |
|                 | Odds Ratio<br>(95% CI)   | P value | Odds Ratio<br>(95% CI) | P value | Hazard ratio<br>(95% CI) | P value | Hazard Ratio<br>(95% CI) | P value |
| <b>FN1</b>      | 1.28(1.01-1.61)          | 0.038   | 1.21 (0.93-1.58)       | 0.163   | 1.30 (1.05-1.61)         | 0.015   | 1.26 (1.01-1.58)         | 0.040   |
| <b>CTSD</b>     | 1.52 (1.20-1.92)         | <0.001  | 1.58 (1.19-2.11)       | 0.002   | 1.38 (1.13-1.68)         | 0.002   | 1.30 (1.04-1.61)         | 0.019   |
| <b>CALP</b>     | 1.48 (1.15-1.92)         | 0.003   | 1.31 (0.93-1.85)       | 0.125   | 1.52 (1.21-1.90)         | <0.001  | 1.48 (1.15-1.90)         | 0.003   |
| <b>LGALS3BP</b> | 1.68 (1.33-2.12)         | <0.001  | 1.80 (1.33-2.43)       | <0.001  | 1.24 (1.03-1.49)         | 0.023   | 1.12 (0.91-1.37)         | 0.290   |
| <b>MMP9</b>     | 1.45 (1.13-1.87)         | 0.003   | 1.53 (1.12-2.08)       | 0.008   | 1.40 (1.14-1.73)         | 0.002   | 1.36 (1.09-1.69)         | 0.006   |
| <b>CHI3L1</b>   | 1.40 (1.10-1.78)         | 0.006   | 1.48 (1.10-1.99)       | 0.010   | 1.31 (1.08-1.59)         | 0.005   | 1.32 (1.07-1.63)         | 0.009   |

Odds ratios (OR) are derived from logistic regression analysis and hazard ratios (HR) from Cox models. OR and HR are expressed for a 1-SD higher log<sub>e</sub> transformed level of given marker. CI denotes confidence interval.

Model 1 was adjusted for age (years) and sex.

Model 2 was adjusted for age (years), sex, low density lipoprotein cholesterol (mg/dL), high density lipoprotein cholesterol (mg/dL), high-sensitivity C-reactive protein (mg/L), diabetes mellitus (0 vs 1), hypertension (0 vs 1), smoking (pack-years), body mass index (kg/m<sup>2</sup>).

\* Additionally adjusted for atherosclerosis score (mm).

**Supplementary Table 8: Baseline characteristics of cases and age- and sex-matched subcohort members at baseline in the SAPHIR Study.**

| Characteristics                    | Cases (N=58)         | Subcohort (N=151)    |
|------------------------------------|----------------------|----------------------|
|                                    | Mean±SD or number(%) | Mean±SD or number(%) |
| Age, years                         | 51.9±6.5             | 51.8±6.3             |
| Female sex, n (%)                  | 14 (24.1)            | 36 (23.8)            |
| Current smoking, n (%)             | 13 (22.4)            | 37 (24.5)            |
| Body mass index, kg/m <sup>2</sup> | 28.6±5.4             | 27.0±4.0             |
| Diabetes mellitus, n (%)           | 2 (3.5)              | 3 (2.0)              |
| Hypertension, n (%)                | 47 (81.0)            | 91 (60.3)            |
| HDL-Cholesterol, mg/dL             | 51.3±13.8            | 56.9±15.2            |
| LDL-Cholesterol, mg/dL             | 155.2±34.2           | 147.3±33.0           |
| C-reactive protein, mg/L           | 3.4±4.9              | 2.5±4.2              |

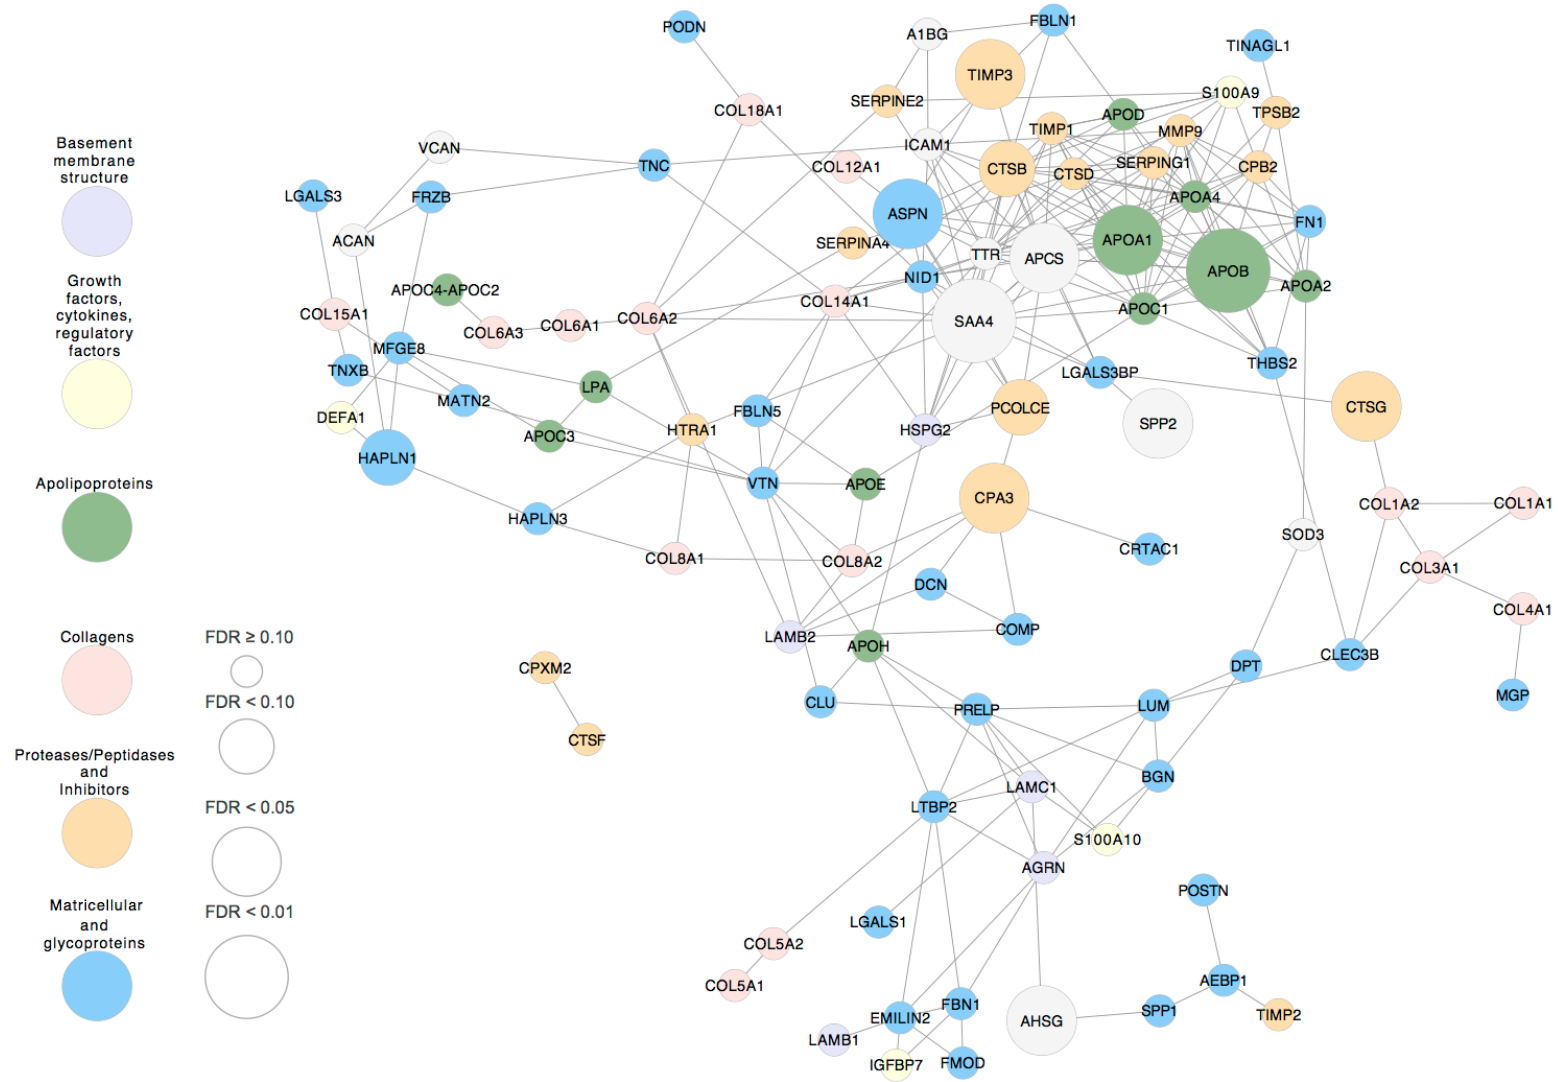

**Supplementary Figure 1: Protein network in the GuHCl fraction.** Co-expression network in the GuHCl fraction calculated with Pearson correlation values. The edges were correlation values at a FDR<20% level. The sizes of the nodes indicate the level of differential expression between plaques from symptomatic and asymptomatic patients and the colours represent different protein classifications (green - apolipoproteins; pink - collagens; orange - proteases/peptidases and inhibitors; blue – matricellular and glycoproteins; purple - basement proteins; yellow - growth factors, cytokines, and regulatory factors; white - other). The nodes with a thicker grey circle are those which have also been identified at the protein expression level.

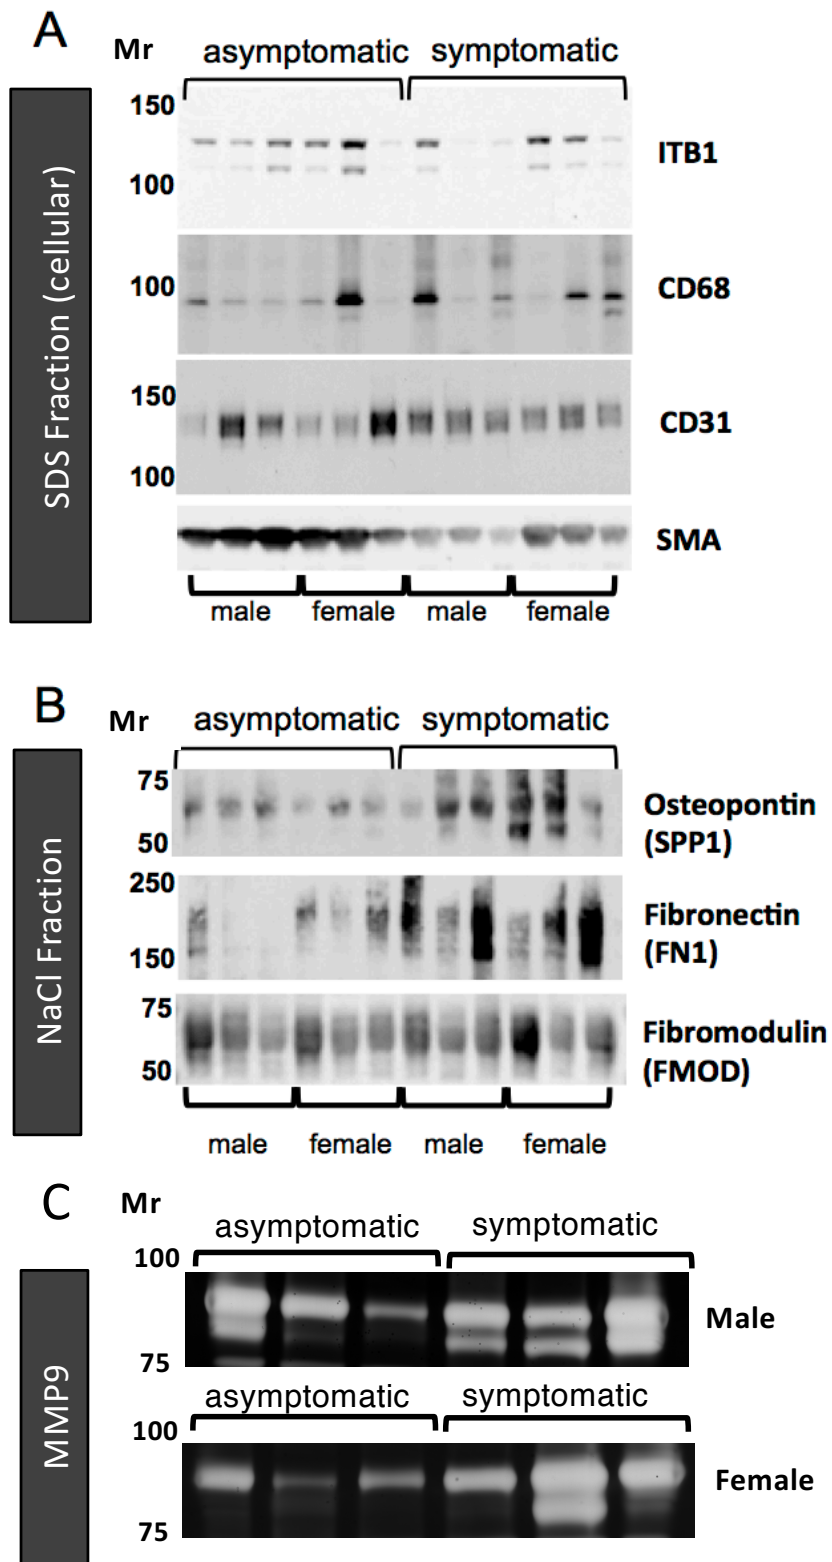

**Supplementary Figure 2.** Western blots and zymography. (A) First, immunoblotting was performed for selected cellular markers, including integrin beta 1 (ITB1), CD31, CD68, and smooth muscle actin (SMA). Consistent with a stable plaque phenotype, SMA was significantly increased in plaques from asymptomatic patients ( $p=0.002$ ). CD68 levels, as indicator of the macrophage content, were far more variable between plaques. (B) In agreement with the proteomics data, osteopontin (SPP1) and fibronectin (FN1) were elevated in the NaCl fraction of atherosclerotic plaques from symptomatic patients. SPP1, FN1 and fibromodulin (FMOD) were quantified by immunoblotting. (C) MMP9 in the NaCl fraction was measured by zymography and, in agreement with the proteomics data, was elevated in the symptomatic patients.

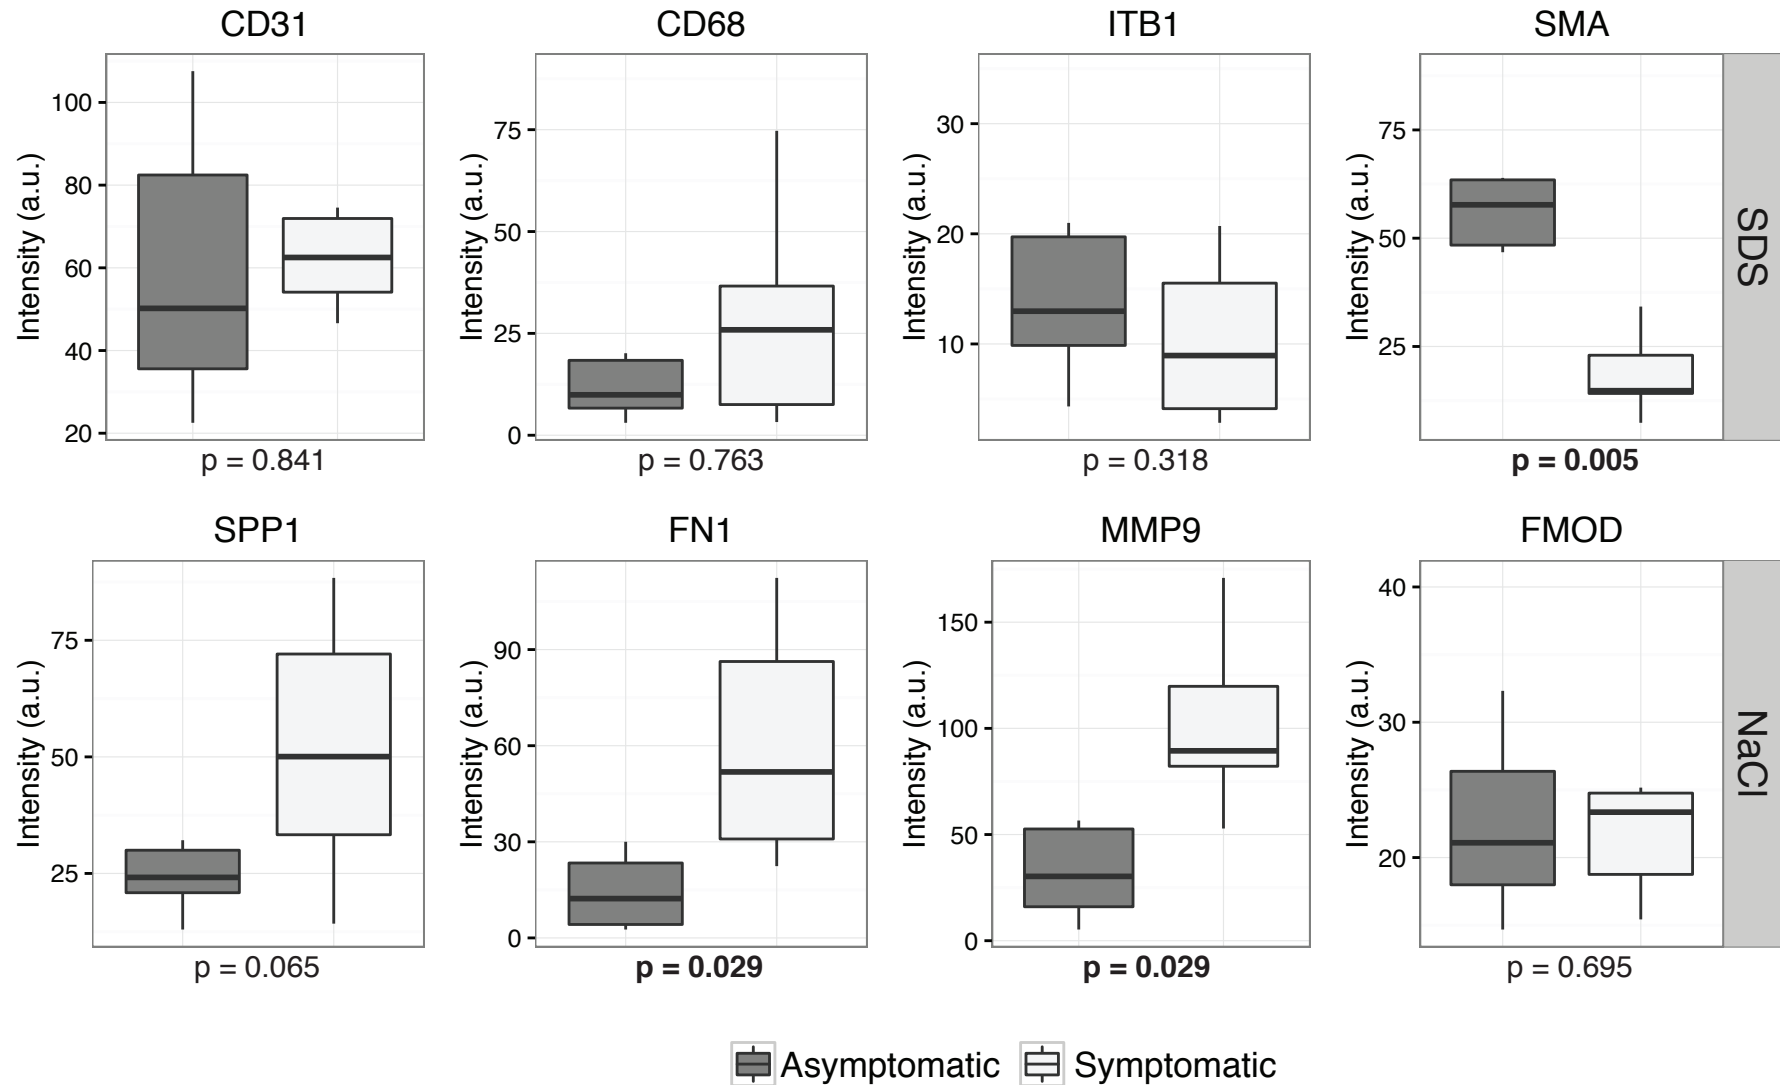

**Supplementary Figure 3. Densitometry.** ImageJ software (V.1.4.3.67; NIH) was used for the densitometry of each lane of the developed films in Supplementary Figures 2A (upper panel, SDS fraction) and 2B-C (lower panel, NaCl fraction). P-values were derived from unpaired Student's t-test with unequal variance (n=6 per group). ITB1 - Integrin Beta 1; SMA - Smooth Muscle Actin; SPP1 - Osteopontin; FN1 - Fibronectin; MMP9 - Matrix Metalloproteinase 9; FMOD - Fibromodulin.

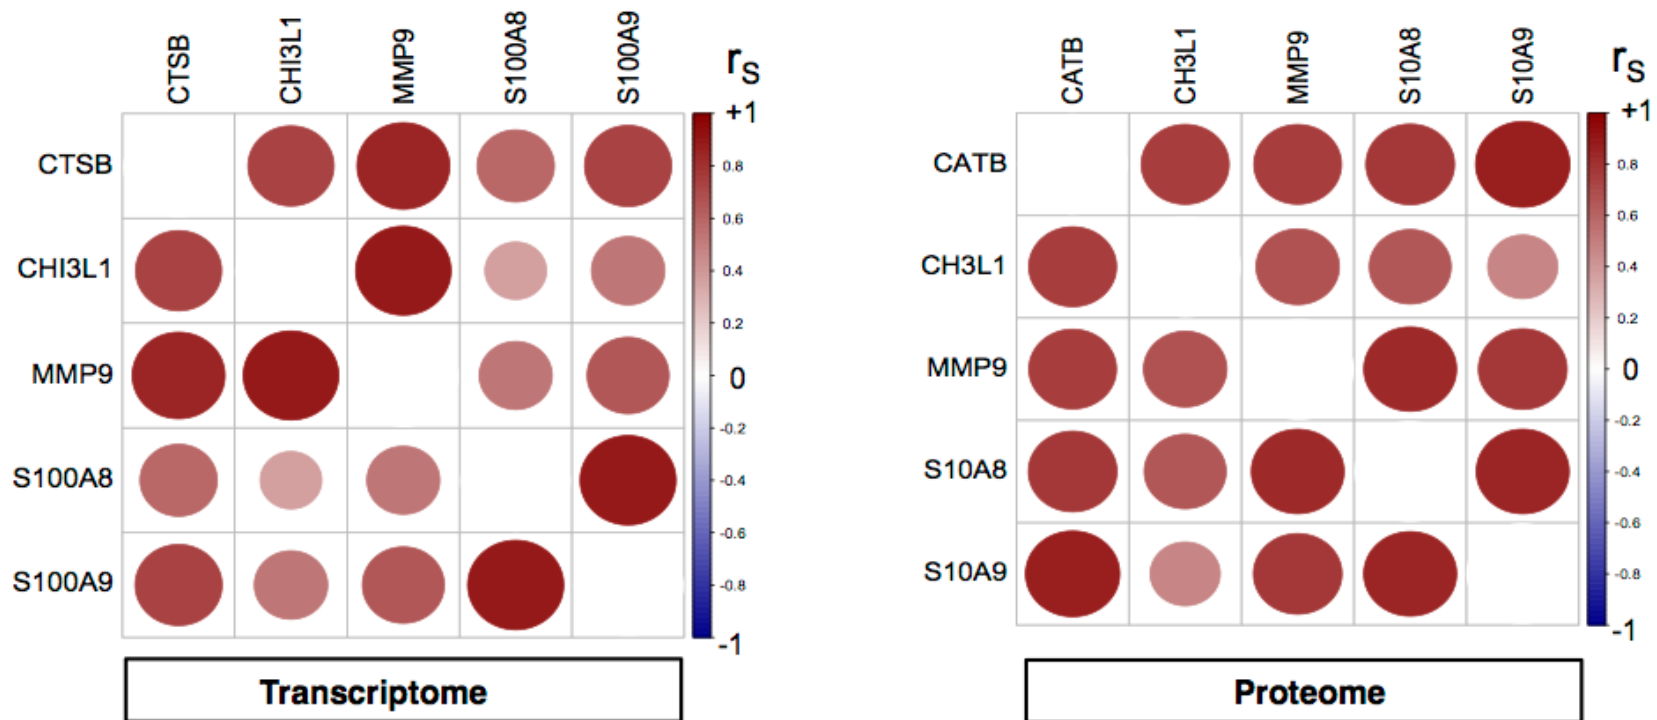

**Supplementary Figure 4. Correlations within protein and gene levels.** Correlations within the significantly differentially expressed proteins and genes identified 5 in the transcriptomics and proteomics dataset (FDR<10%). The correlation coefficients between the proteins and genes showed a high positive correlation as indicated by the color and size, where the colour is indicated by the scale bar and the size is proportional to the absolute value of the correlation coefficient.

AHSG, Alpha-2-HS-glycoprotein;  
 APCS, Serum amyloid P-component;  
 APOA1, Apolipoprotein A-I;  
 APOA2, Apolipoprotein A-II;  
 APOB, Apolipoprotein B;  
 APOC3, Apolipoprotein C-III;  
 APOD, Apolipoprotein D;  
 APOL1, Apolipoprotein L1;  
 APP, Amyloid beta A4 protein;  
 ASPN, Asporin;  
 CHI3L1, Chitinase-3-like protein 1;  
 CLEC3B, Tetranectin;  
 COL14A1, Collagen alpha-1(XIV) chain;  
 COL1A1, Collagen alpha-1(I) chain;  
 COL3A1, Collagen alpha-1(III) chain;  
 COL6A3, Collagen alpha-3(VI) chain;  
 COL6A3, Collagen alpha-3(VI) chain;  
 CPA3, Mast cell carboxypeptidase A;  
 CRTAC1, Cartilage acidic protein 1;  
 CTHRC1, Collagen triple helix repeat-containing protein 1;  
 CTSB, Cathepsin B;  
 CTSG, Cathepsin G ;  
 FN1, Fibronectin;  
 FRZB, Secreted frizzled-related protein 3;  
 HAPLN1, Hyaluronan and proteoglycan link protein 1;  
 ICAM1, Intercellular adhesion molecule 1;  
 LGALS3BP, Galectin-3-binding protein;  
 LTBP4, Latent-transforming growth factor beta-binding protein 4;  
 MMP9, Matrix metalloproteinase-9;  
 OMD, Alpha-1-acid glycoprotein 2;  
 PCOLCE, Procollagen C-endopeptidase enhancer 1;  
 PTX3, Pentraxin-related protein PTX3;  
 S100A8, Protein S100-A8;  
 S100A9, Protein S100-A9;  
 SAA4, Serum amyloid A-4 protein;  
 SERPINA4, Kallistatin;  
 SPP1, Osteopontin;  
 SPP2, Secreted phosphoprotein 24;  
 TIMP1, Metalloproteinase inhibitor 1;  
 TIMP2, Metalloproteinase inhibitor 2;  
 TIMP3, Metalloproteinase inhibitor 3;  
 TNC, Tenascin.

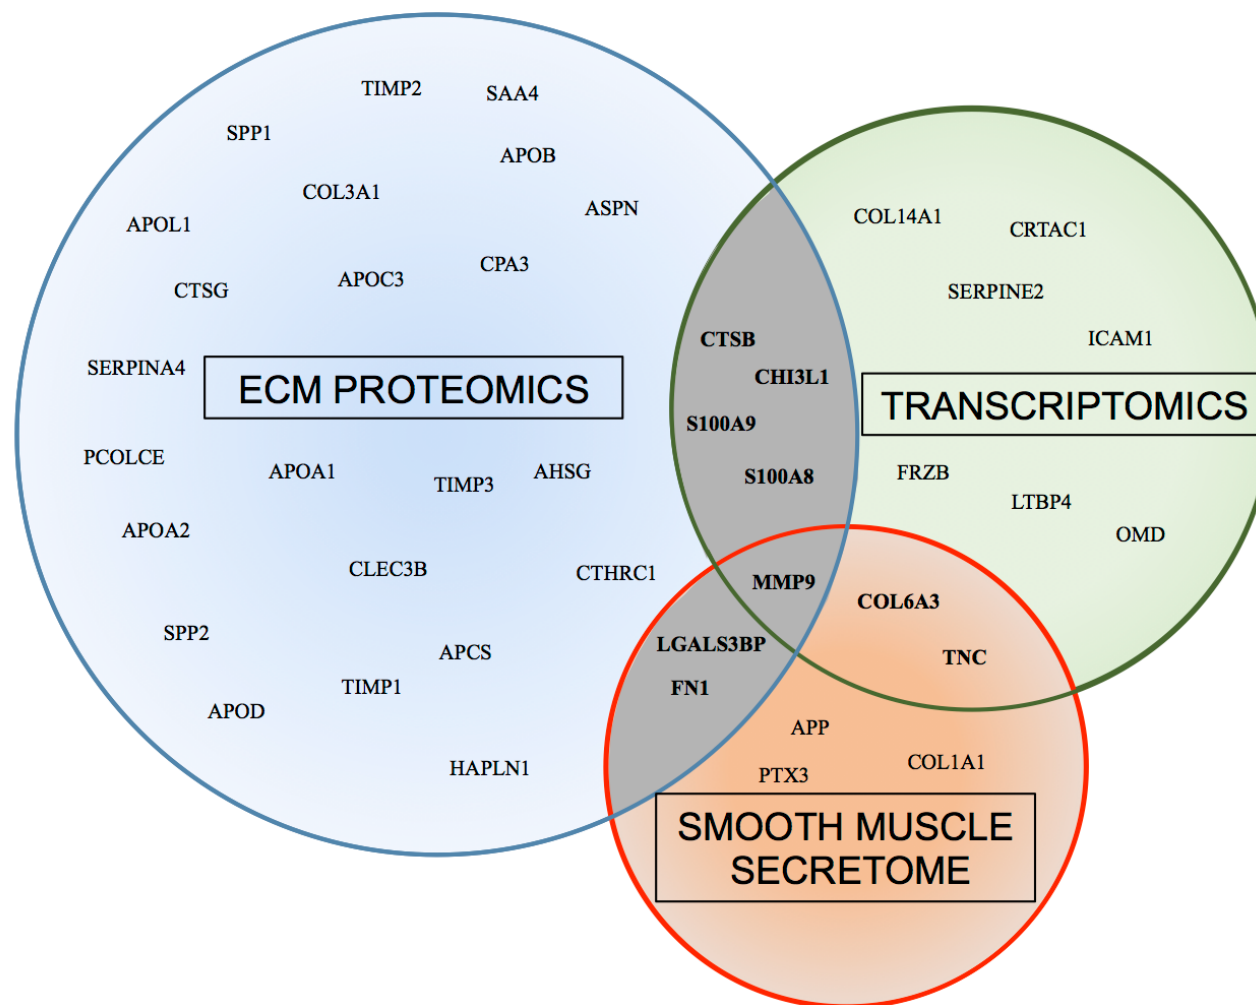

**Supplementary Figure 5: Venn diagram.** Proteins differentially expressed in plaques from symptomatic versus asymptomatic patients using ECM proteomics (blue circle) or ECM transcriptomics (green circle), as well as proteins found in the secretome (deposited ECM and conditioned media) of lipid-loaded versus unstimulated SMCs (red circle), and their overlap (grey area). Candidate proteins required identification by ECM proteomics and at least one of the other two discovery approaches.

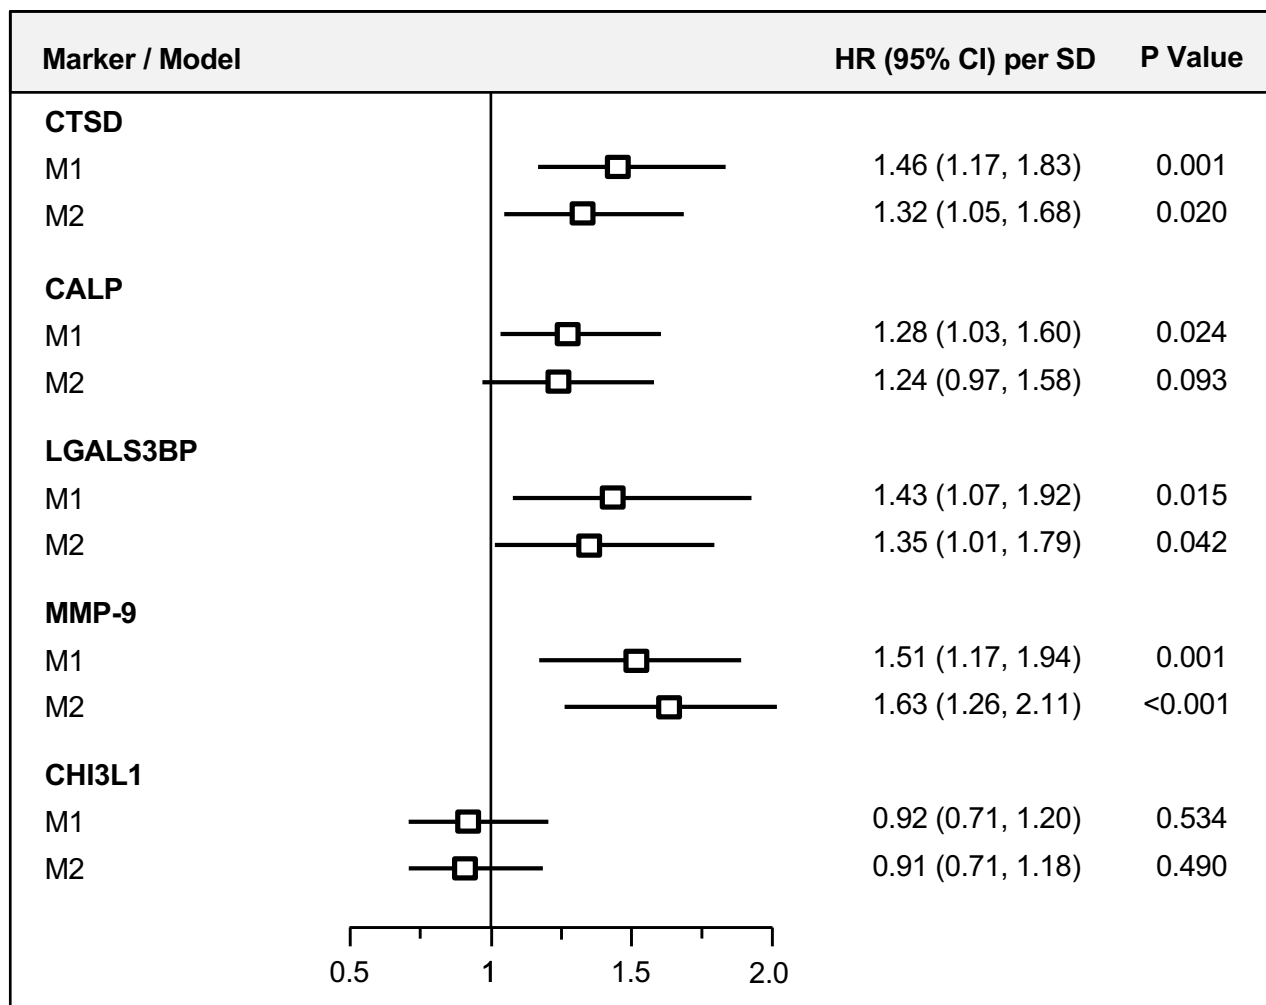

**Supplementary Figure 6: Association between markers of plaque vulnerability and CVD in the Saphir Study.** Hazard ratios were derived from Cox proportional hazard regression models using time-on-study as a timescale and applying Prentice weights and robust SEs (case-cohort design). HRs were expressed for a 1-SD higher  $\log_e$ -transformed level of given marker. Model 1 (M1) was adjusted for age and sex. Model 2 (M2) was adjusted for age, sex, LDL and HDL cholesterol, high-sensitivity C-reactive protein, diabetes mellitus, hypertension, smoking, and body mass index. CTSD, cathepsin D; CALP, calprotectin; LGALS3BP, galectin-3-binding protein; MMP9, matrix metalloproteinase-9; CHI3L1, chitinase-3-like protein 1.



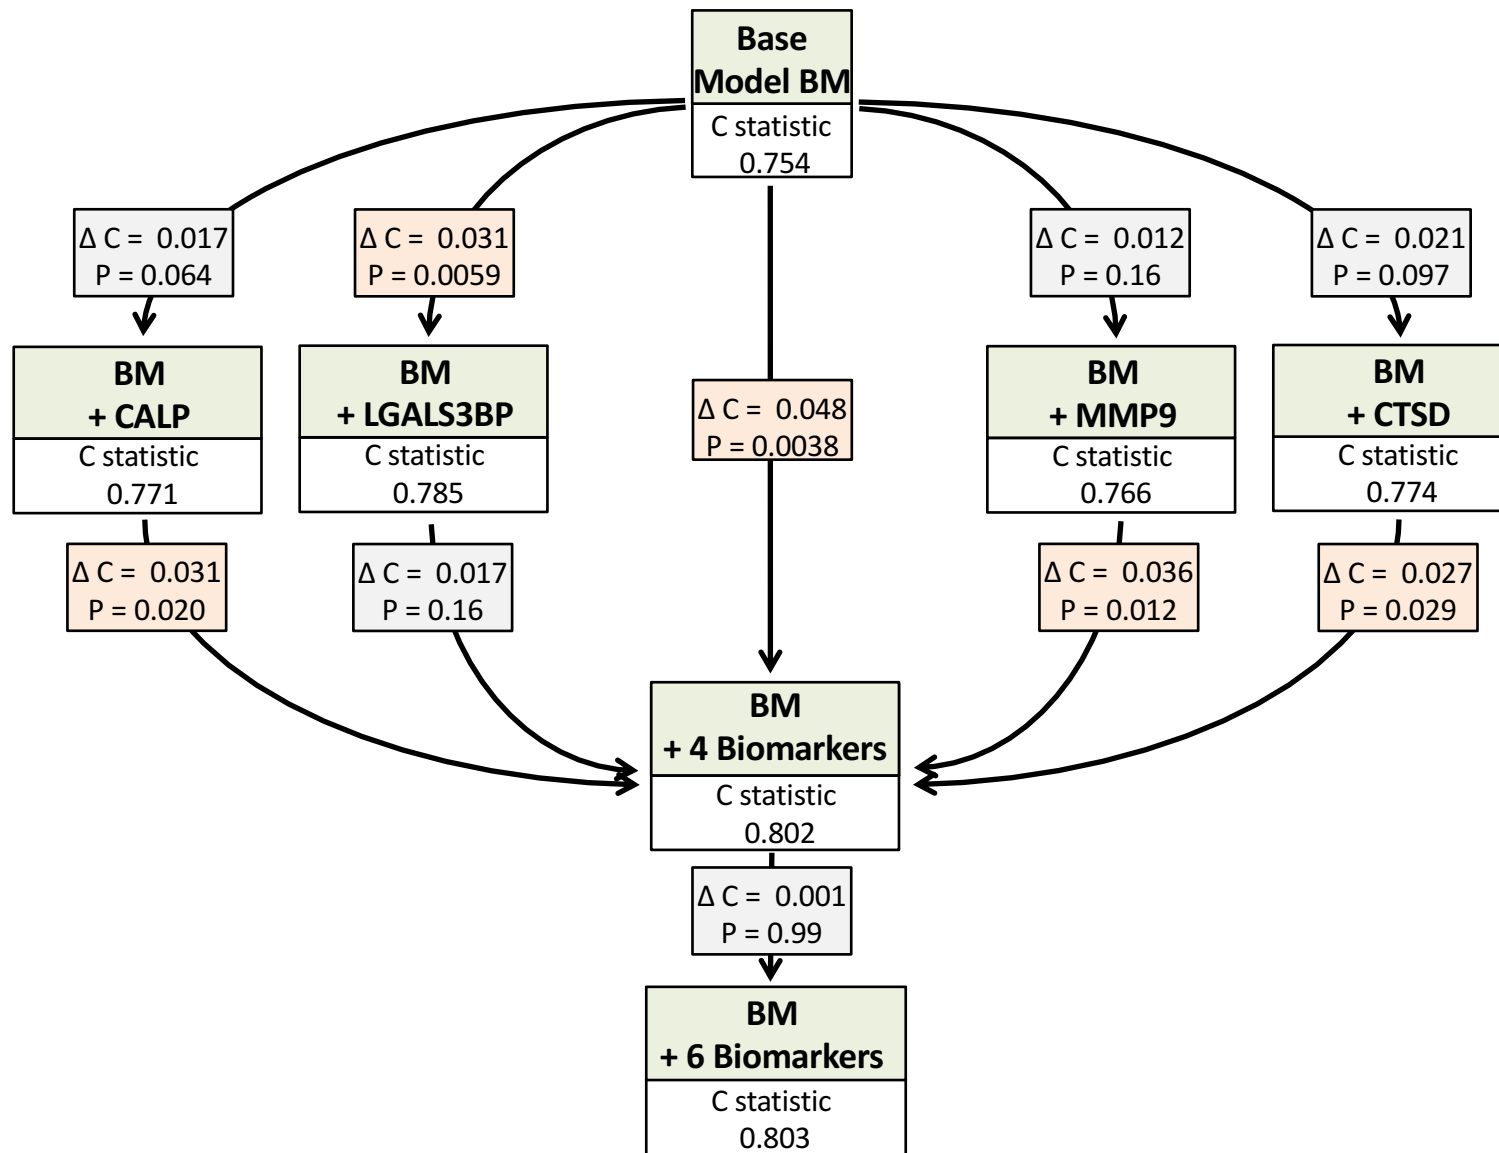

**Supplementary Figure 7: Improvement in discrimination of the risk of advanced atherosclerosis (progression 2000 to 2010) with the use of single and combined markers of symptomatic plaques (Bruneck Study).** The C-statistic, a measure of risk discrimination, was calculated as the area under a receiver operating characteristic (ROC) curve. The base model (BM) was adjusted for age, sex, LDL and HDL cholesterol, diabetes mellitus, hypertension, and smoking. Changes in the C-statistic ( $\Delta C$ ) and corresponding P values are presented for addition of the individual markers of plaque vulnerability to the base model (CALP, LGALS3BP, MMP, CTSD) and for addition of the entire 4-biomarker signature as well as a 6-biomarker signature also considering FN1 and CHI3L1. CALP, calprotectin; LGALS3BP, galectin-3-binding protein; MMP9, matrix metalloproteinase-9; CTSD, cathepsin D; FN1, fibronectin; CHI3L1, chitinase-3-like protein 1.

| Cohorts          | Bruneck Study                                                                                                                                     | Saphir Study                                                                                                                                       |
|------------------|---------------------------------------------------------------------------------------------------------------------------------------------------|----------------------------------------------------------------------------------------------------------------------------------------------------|
| Outcome          | CVD                                                                                                                                               | CVD                                                                                                                                                |
| Model            | Base Model<br>+ 4 Biomarkers                                                                                                                      | Base Model<br>+ 4 Biomarkers                                                                                                                       |
| Discrimination   | $\Delta C = 0.029$<br>P = 0.030                                                                                                                   | $\Delta C = 0.066$<br>P = 0.039                                                                                                                    |
| Reclassification | Cont. NRI = 0.358 (0.134 to 0.582)<br>P = 0.002<br><br>IDI = 0.040 (0.016 to 0.063)<br>P = 0.001<br><br>NRI = 0.104 (0.031 to 0.177)<br>P = 0.005 | Cont. NRI = 0.461 (0.146 to 0.777)<br>P = 0.004<br><br>IDI = 0.036 (0.012 to 0.059)<br>P = 0.003<br><br>NRI = 0.159 (-0.018 to 0.336)<br>P = 0.078 |

**Supplementary Figure 8: Incremental predictive value of the 4-biomarker signature consisting of CALP, LGALS3BP, MMP, and CTSD in the Bruneck and Saphir Studies.** The base model (BM) was adjusted for age, sex, LDL and HDL cholesterol, diabetes mellitus, hypertension, and smoking. The C-statistic (logistic regression models) and C-index (Cox models) and changes thereof upon addition of the 4-biomarker signature were calculated as measures of risk discrimination while the continuous net reclassification index (Cont. NRI), the integrated discrimination improvement (IDI) and the categorical retrospective NRI across predicted 10 year CVD risk categories (<5%, 5% to <7.5%, and  $\geq 7.5\%$ ) were calculated as measures of risk reclassification. CALP, calprotectin; LGALS3BP, galectin-3-binding protein; MMP9, matrix metalloproteinase-9; CTSD, cathepsin D.

**Supplementary Figure 9. Carotid ultrasound protocol of the Bruneck Study.** ICA denotes internal carotid artery; CCA, common carotid artery .

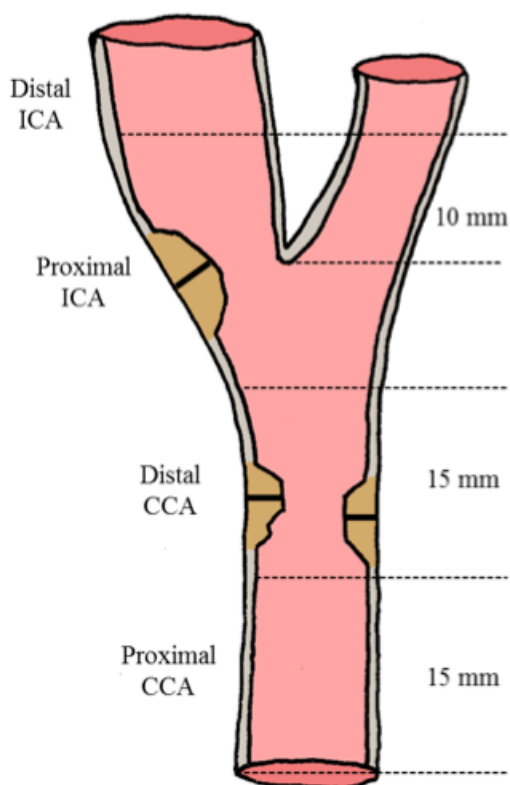

**Supplementary Figure 10. Person-based progression model of atherosclerosis in the Bruneck Study.** Pre-existing atherosclerotic plaques may experience one of two types of disease progression: a) early atherogenesis or b) advanced atherogenesis.

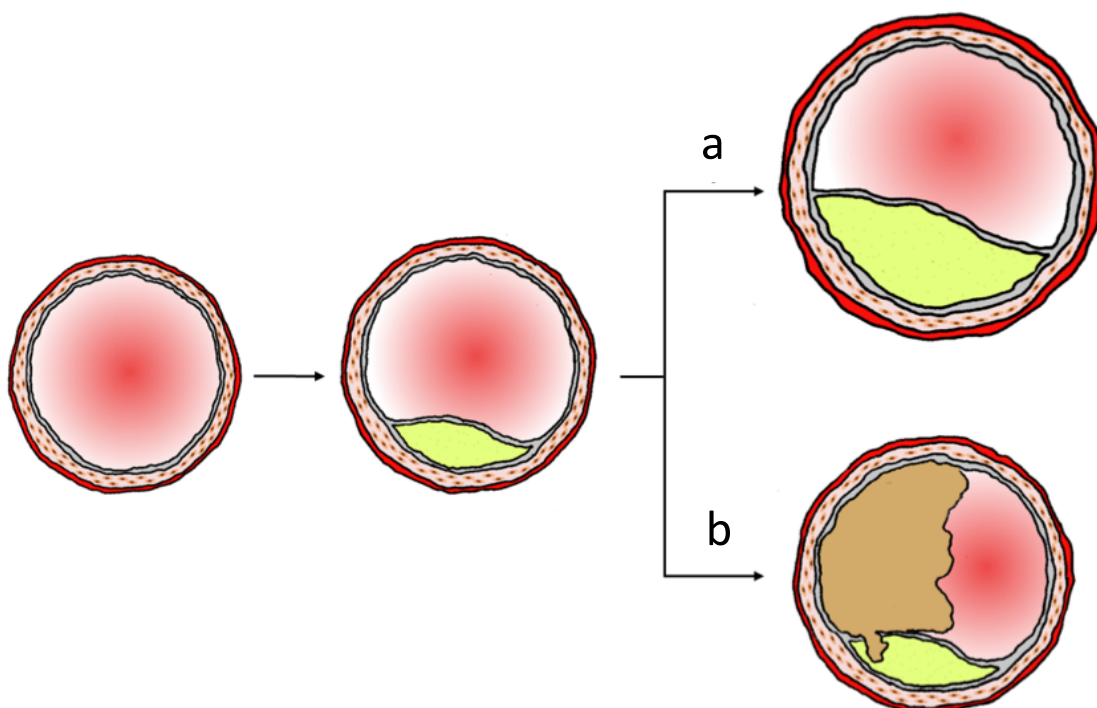

Supplement: jci-127-86924-s001.pdf [file jci-127-86924-s001.pdf]
